# Supplementary material
Source: PubMed Central journal article supplement (PMC8744464)
Supplement: NIHMS1763826-supplement-supplementary_information.pdf [file NIHMS1763826-supplement-supplementary_information.pdf]

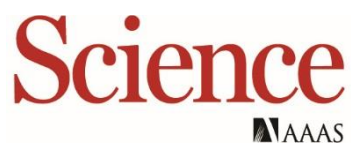

## Supplementary Materials for

### **Nucleolar maturation of the human small subunit processome**

Sameer Singh *et al.*

Corresponding authors: Arnaud Vanden Broeck, [avanden@rockefeller.edu](mailto:avanden@rockefeller.edu); Sebastian Klinge, [klinge@rockefeller.edu](mailto:klinge@rockefeller.edu)

*Science* **373**, eabj5338 (2021)  
DOI: 10.1126/science.abj5338

#### **The PDF file includes:**

Figs. S1 to S22  
Tables S1 to S5  
References

#### **Other Supplementary Material for this manuscript includes the following:**

MDAR Reproducibility Checklist  
Movies S1 to S6  
Data S1

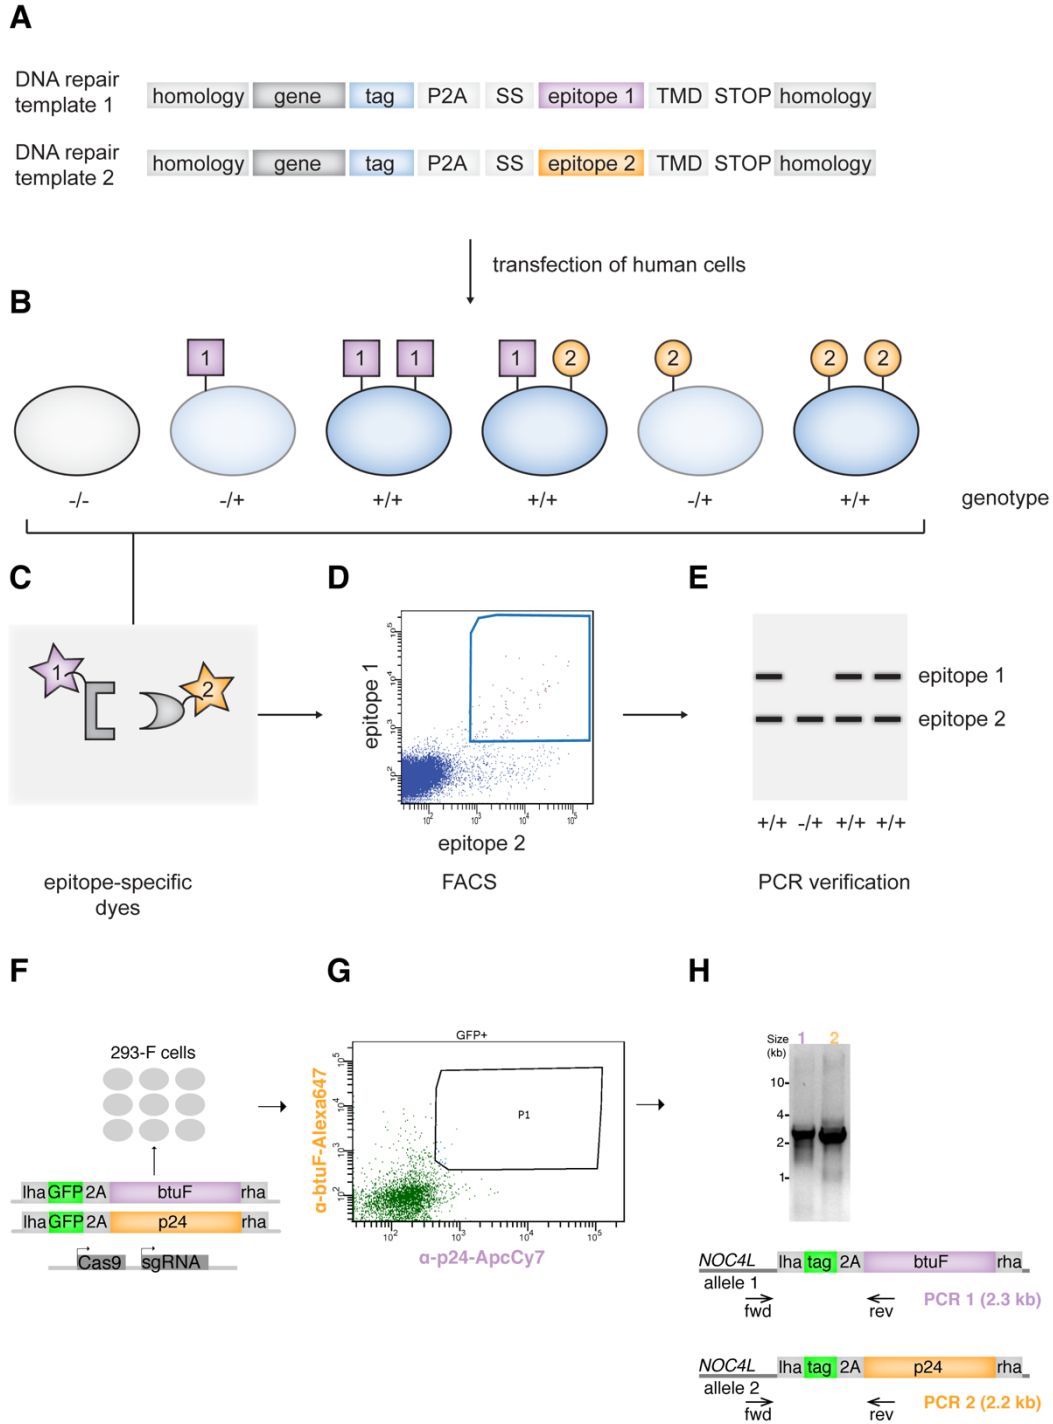

**Fig. S1. Human genome editing with SNEAK PEEC.**

(A) Architecture of the repair templates used for biallelic tagging using SNEAK PEEC. Each repair template contains a left homology arm, a portion of the last exon of the gene (gene), a C-terminal tag (tag), a self-cleaving peptide sequence (P2A), a cell-surface display epitope (SS-epitope1/2-TMD) and a right homology arm (B). Transfection of human cells with the two DNA repair templates and Cas9+sgRNA can result in six different outcomes of cells either containing no edited gene or different monoallelic (-/+)

or biallelic (+/+) combinations. Cells harboring both surface displays represent a biallelically edited clone. **(C, D)** Cells are surface stained using epitope-specific dyes and sorted for single cell clones expressing both surface displays. **(E)** Isolated single clones are genotyped to confirm the genomic integration of both repair templates. **(F)** Transfection of 293-F cells with plasmids containing two repair templates targeting the C-terminus of the NOC4L gene, along with a plasmid expressing Cas9+sgRNA. Each repair template encodes GFP followed by a unique surface display epitope (btuF or p24). **(G)** FACS sorting of transfected cells pre-stained with fluorescent nanobodies ( $\alpha$ -btuF-Alexa647,  $\alpha$ -p24-ApcCy7). Single cell clones were selected for expression of GFP and the two surface display epitopes. **(H)** A biallelically edited clone was identified using two PCR reactions that confirm the integration of a different repair template at each NOC4L allele.

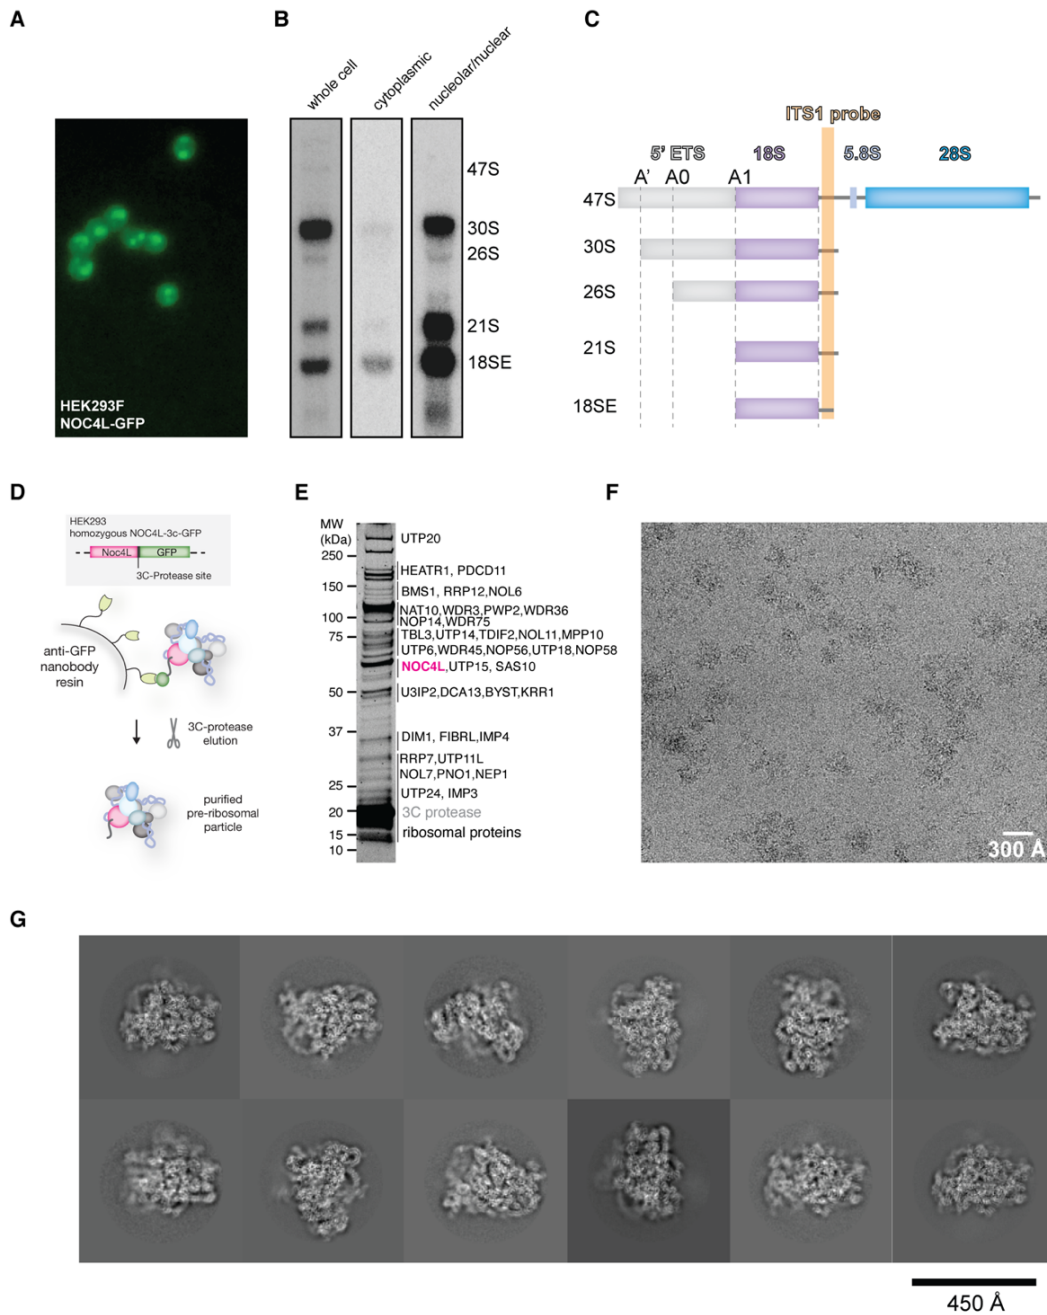

**Fig. S2. Purification of human SSU processomes.**

(A) Fluorescence microscopy image of the NOC4L-GFP 293-F cell line. (B) Northern blot analysis of pre-rRNAs species present in the whole cell fraction as well as those extracted by sequential lysis. A probe hybridizing within ITS1 was used. (C) Schematic of pre-rRNAs species detected using the ITS1 probe. The positions of RNA cleavage sites are indicated above. (D) Schematic of a one-step purification strategy to isolate human NOC4L-GFP tagged pre-ribosomal particles. (E) SYPRO Ruby stained SDS-PAGE analysis of purified fraction containing pre-ribosomal particles. Bait protein (NOC4L; pink) and molecular weight markers are indicated on the left (MW). (F) A representative cryo-EM micrograph. (G) Unsupervised 2D class averages.

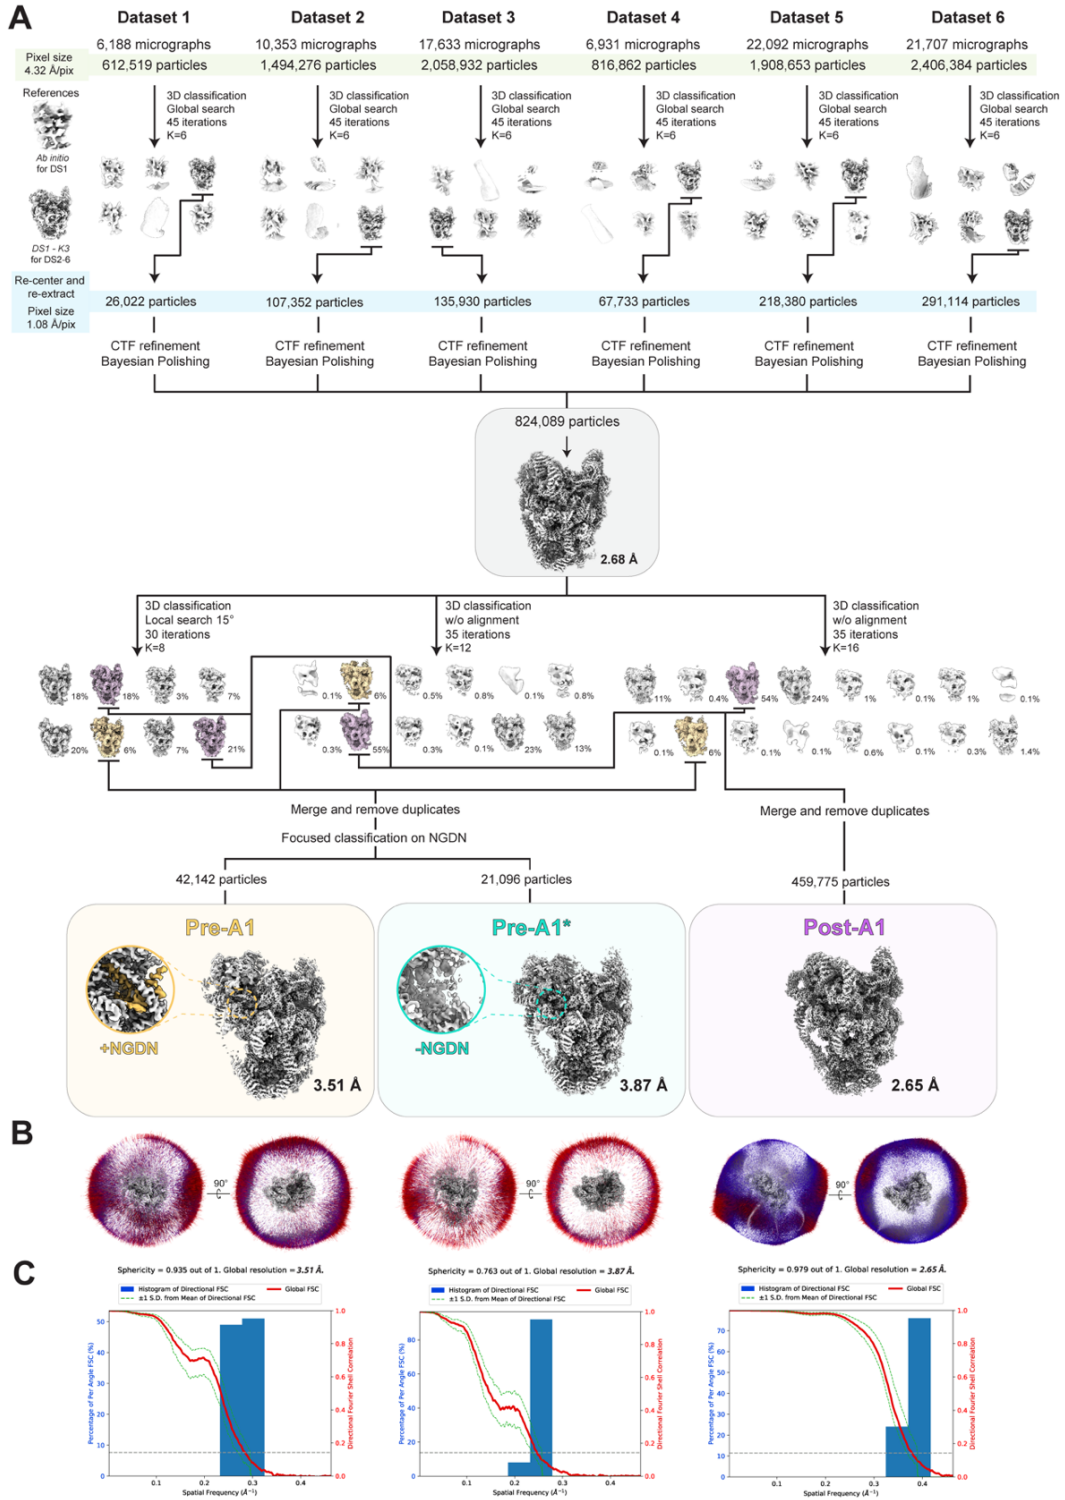

**Fig. S3. Structure determination of human SSU processomes.**

(A) Cryo-EM data processing workflow for the structure determination of human SSU processomes. (B) Euler angle distribution of human SSU processomes reconstructions. Each cone represents a view, the height being proportional to the number of particles contributing to that view. (C) 3D-FSC curve (74) for each reconstruction.

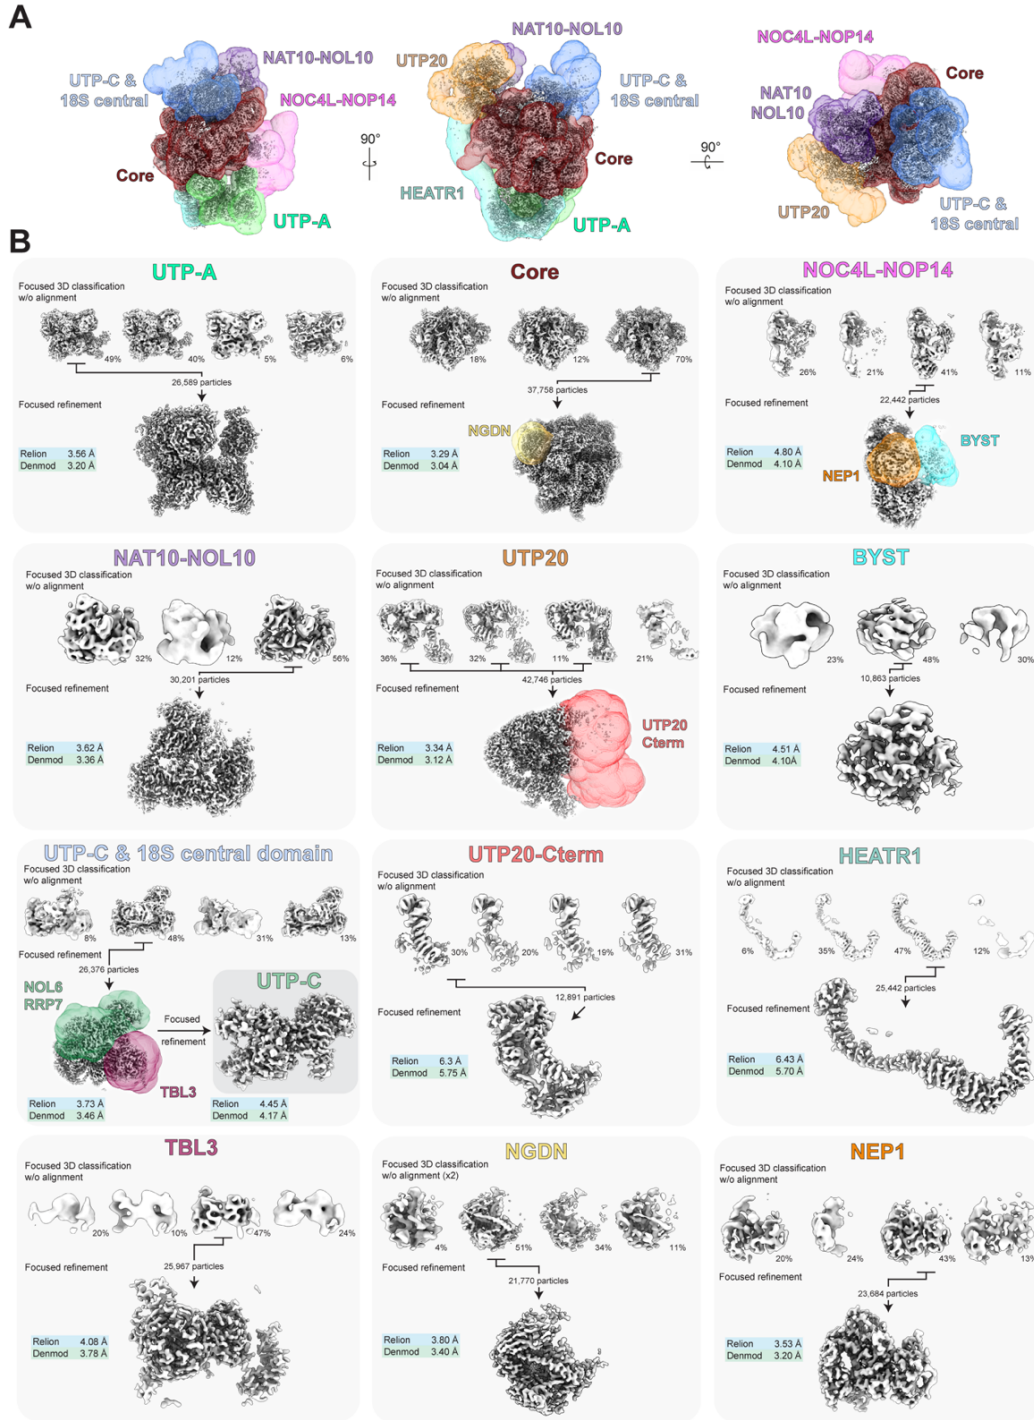

**Fig. S4. Cryo-EM processing of state pre-A1.**

(A) Cryo-EM structure of the human SSU processome in state pre-A1 shown in different views. (B) Multiple focused 3D classifications and refinement strategies used for the reconstruction of sub-modules of the SSU processome in state pre-A1. The maps were further improved with phenix.resolve\_cryo\_em (Denmod). Reported resolutions from Relion and Denmod are indicated in blue and green, respectively. Masks used for the different classifications and refinements are color-coded and shown in (A) or (B).

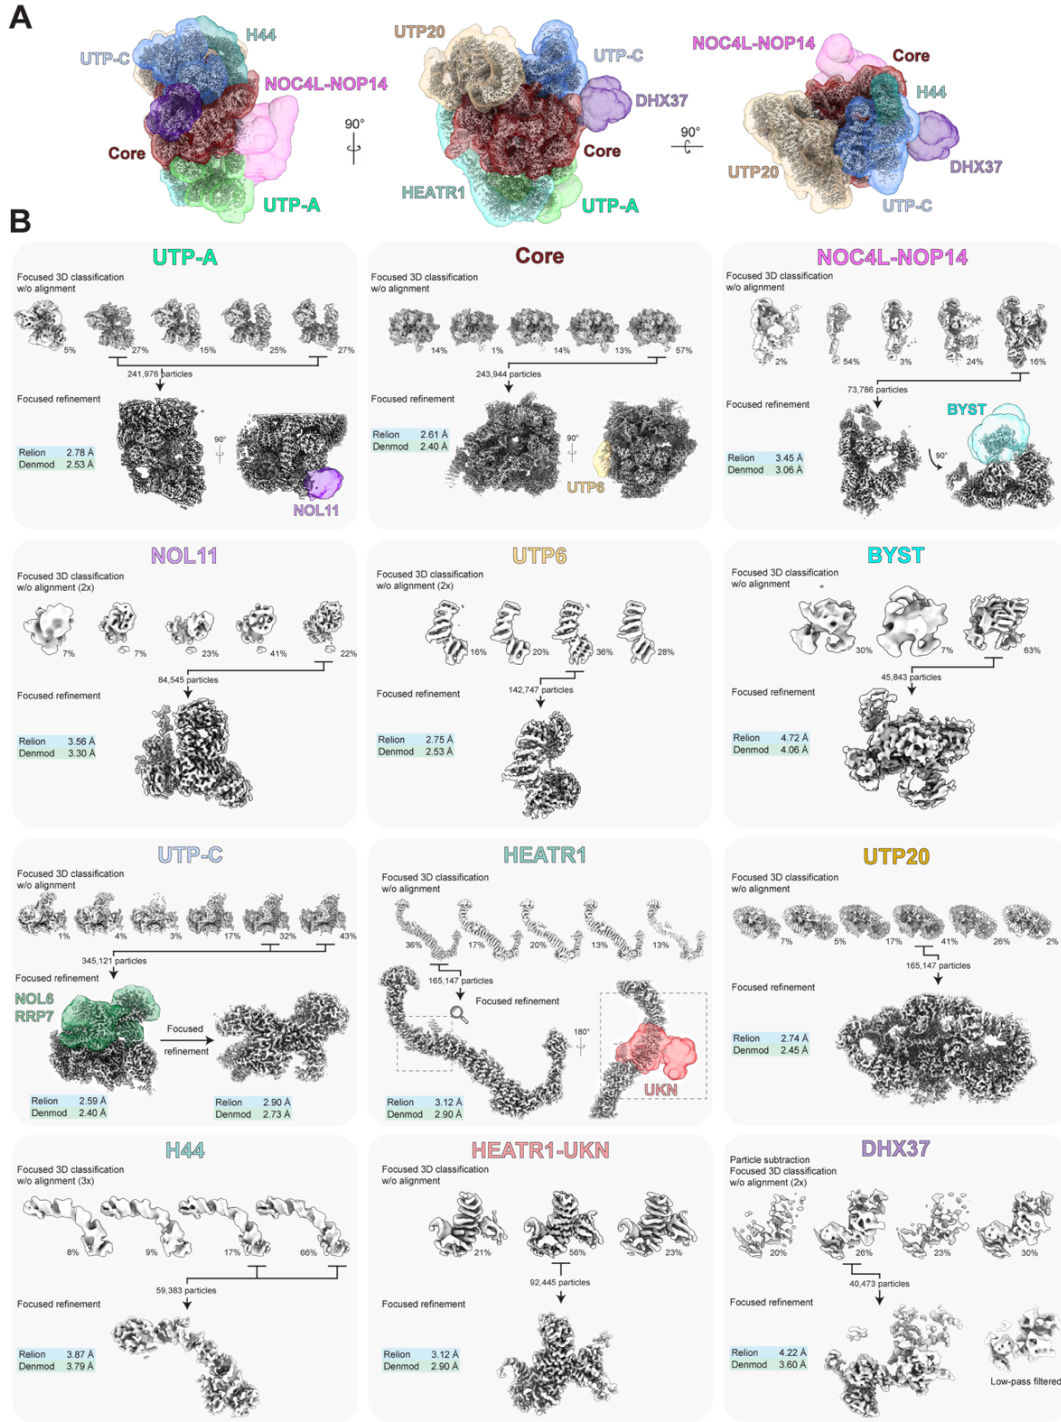

**Fig. S5. Cryo-EM processing of state post-A1.**

(A) Cryo-EM structure of the human SSU processome in state post-A1 shown in different views. (B) Multiple focused 3D classifications and refinement strategies used for the reconstruction of sub-modules of the SSU processome in state post-A1. The maps were further improved with phenix.resolve\_cryo\_em (Denmod). Reported resolutions from Relion and Denmod are indicated in blue and green, respectively. Masks used for the different classifications and refinements are color-coded and shown in (A) or (B).

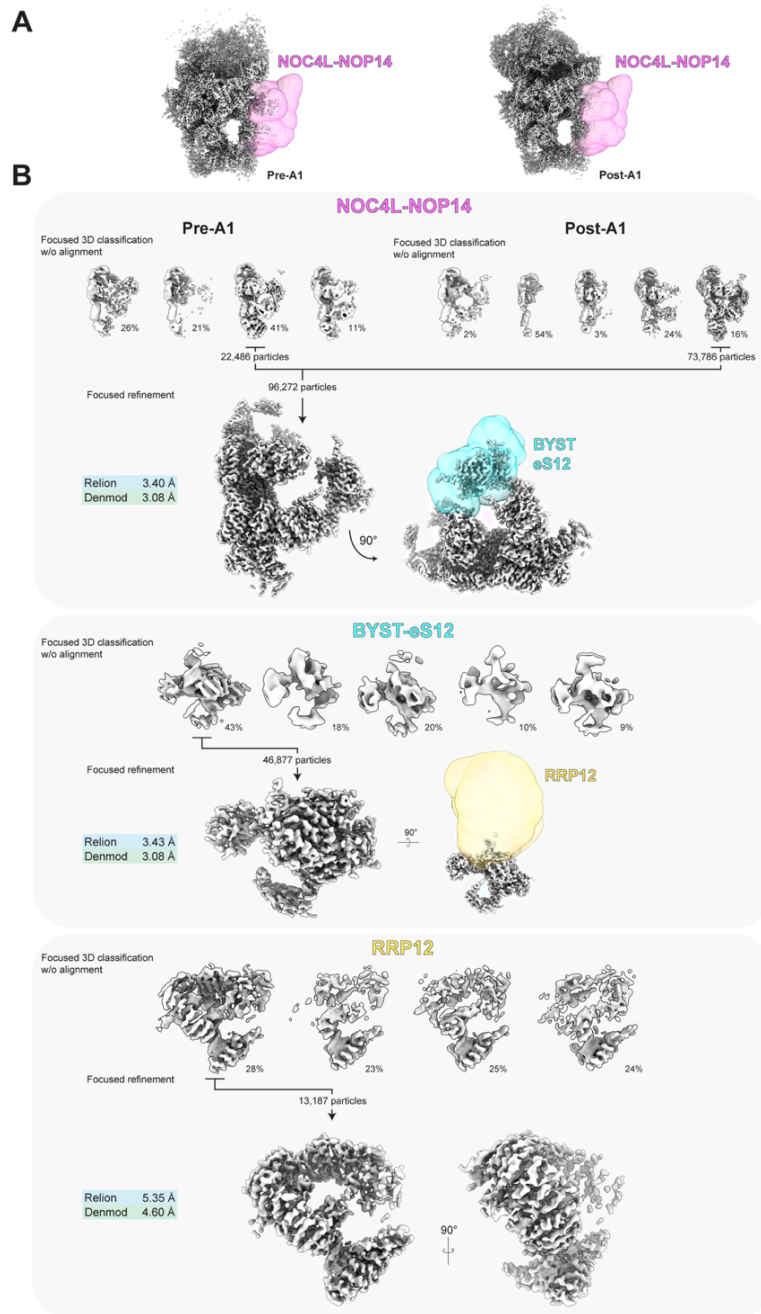

**Fig. S6. Cryo-EM processing of elements present in states pre-A1 and post-A1.**

(A) Cryo-EM structure of the human SSU processome state pre-A1 and post-A1 shown from a side view. (B) Focused 3D classification and refinement strategy used for the reconstruction of the NOC4L-NOP14, BYST-eS12 and RRP12 modules. Particles from pre-A1 and post-A1 states were merged to increase the quality and resolution of the reconstruction. The reconstructions were further improved with phenix.resolve\_cryo\_em (Denmod). Reported resolutions from Relion and Denmod are indicated in blue and green, respectively. Masks used for the different classifications and refinements are color-coded and shown in (A) or (B).



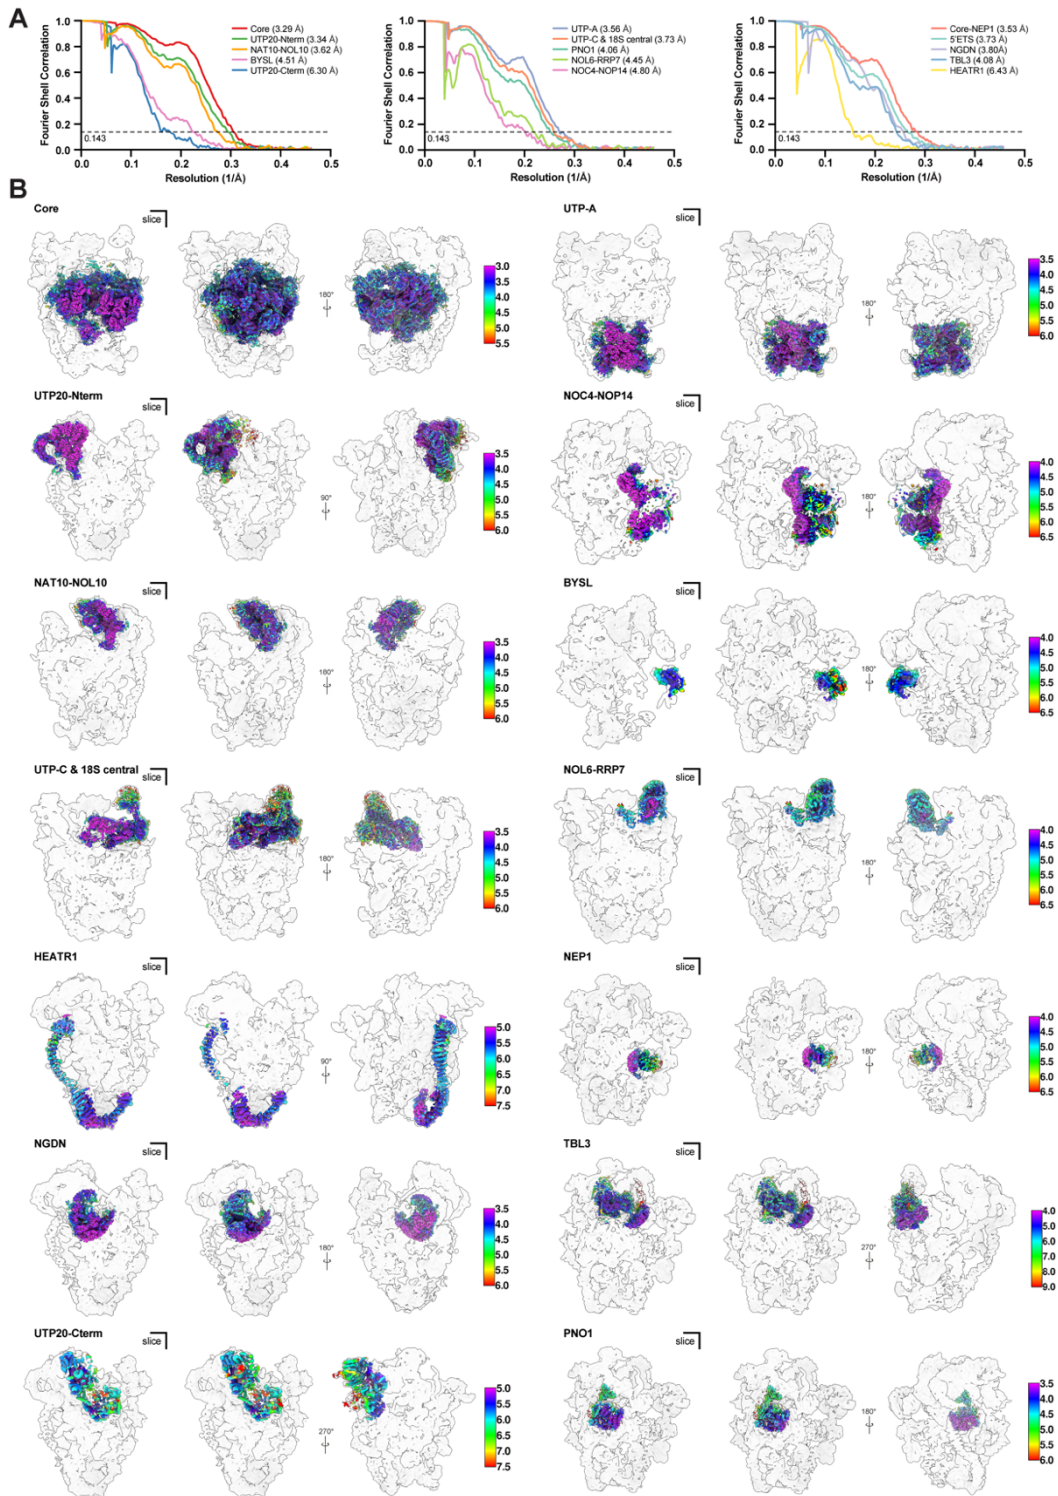

**Fig. S7. Local resolution analysis of state pre-A1.**

(A) Solvent-corrected FSC curves of the different focused refinements. The resolution is indicated for each map and was determined at FSC-0.143 (B) Local resolution estimation of the cryo-EM maps from the focused refinements, displayed in their respective location within the SSU processome.

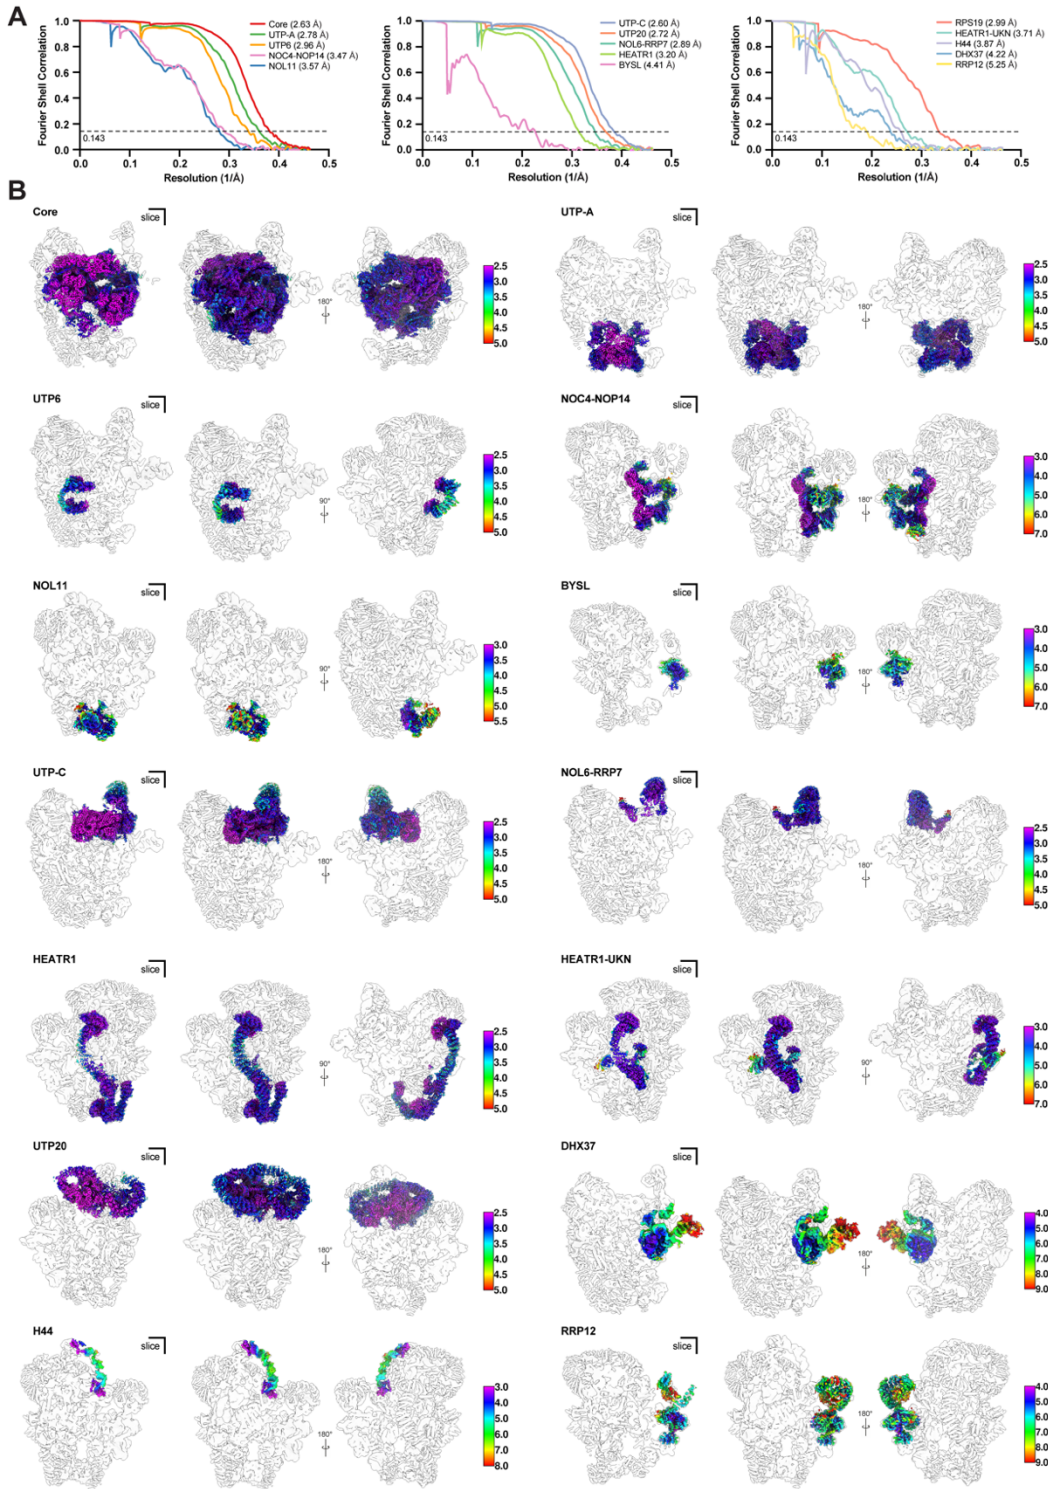

**Fig. S8. Local resolution analysis of state post-A1.**

(A) Solvent-corrected FSC curves of the different focused refinements. The resolution is indicated for each map and was determined at FSC-0.143. (B) Local resolution estimation of the cryo-EM maps from the focused refinements, displayed in their respective location within the SSU processome.

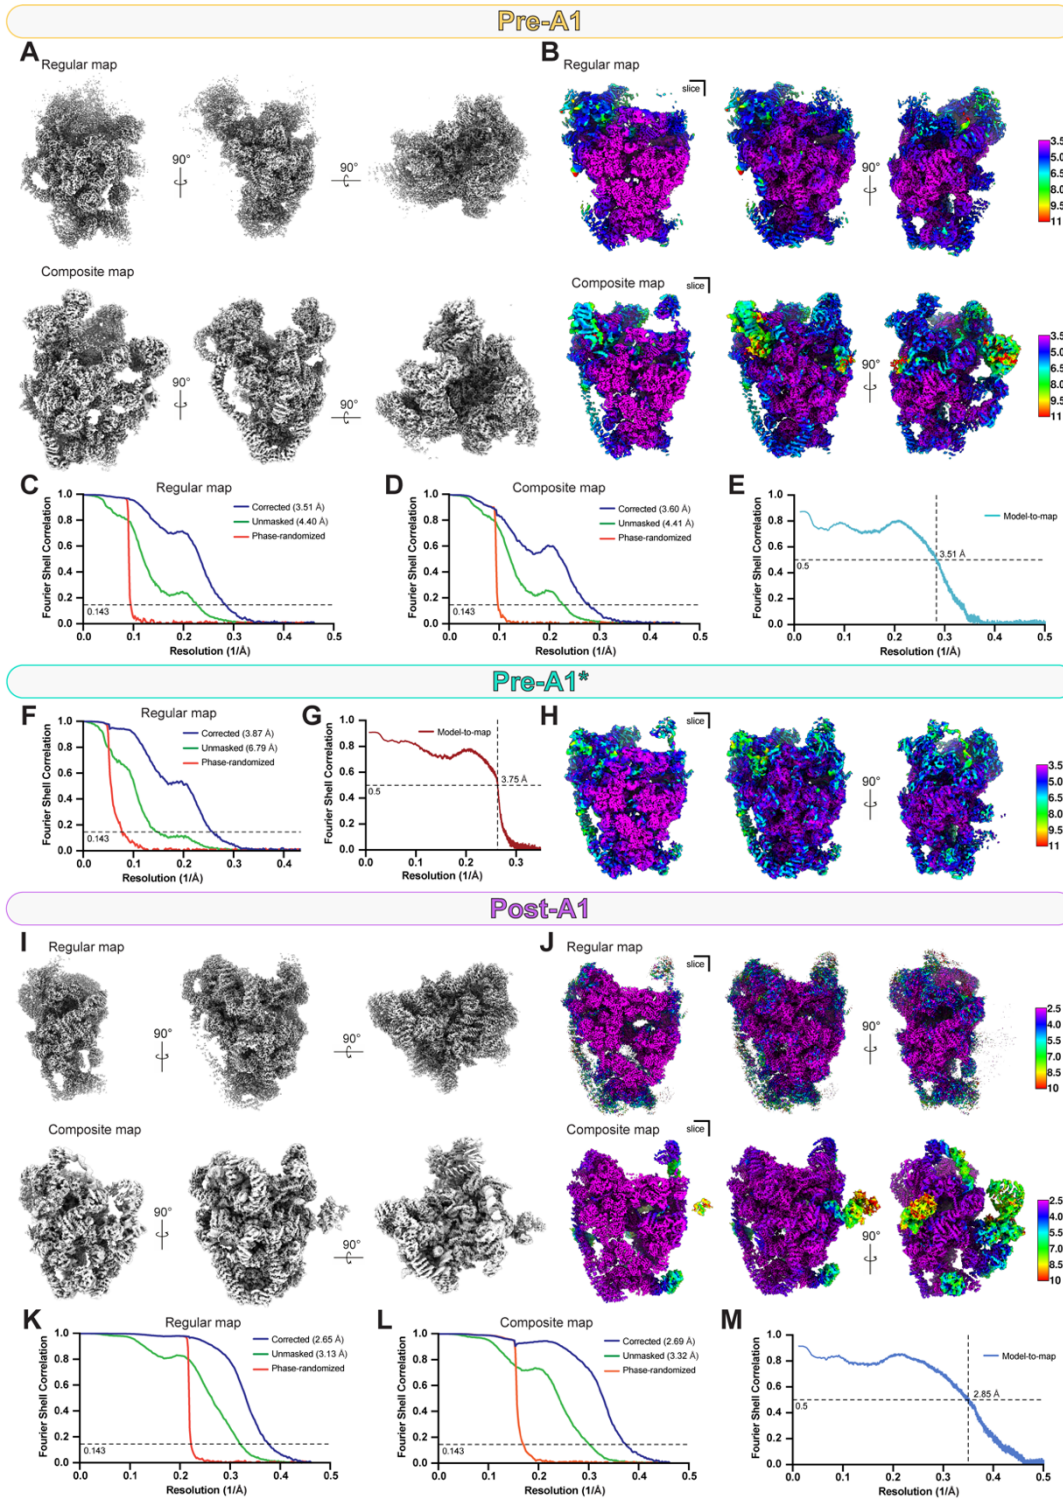

**Fig. S9. Cryo-EM map analysis of human SSU processome states.**

(A) Comparison of the regular cryo-EM reconstruction of human SSU processome state pre-A1 with its composite version. (B) Local resolution estimation of the regular and composite EM reconstructions of state pre-A1. (C, D) Solvent-corrected and unmasked FSC curves of the regular (C) and composite (D) cryo-EM maps of state pre-A1. (E) Map-

to-model FSC curve showing the fit of the overall atomic structure in state pre-A1 with respect to the composite map used for refinement. **(F)** Solvent-corrected and unmasked FSC curve of the human SSU processome in state pre-A1\*. **(G)** Map-to-model FSC curve showing the fit of the overall atomic structure in state pre-A1\* with respect to the map used for refinement. **(H)** Local resolution estimation of the EM reconstruction of state pre-A1\*. **(I)** Comparison of the regular cryo-EM reconstruction of human SSU processome in state pre-A1 with its composite version. **(J)** Local resolution estimation of the regular and composite EM reconstructions of state post-A1. **(K, L)** Solvent-corrected and unmasked FSC curves of the regular (K) and composite (L) cryo-EM maps of state post-A1. **(M)** Map-to-model FSC curve showing the fit of the overall atomic structure in state post-A1 with respect to the composite map used for refinement.

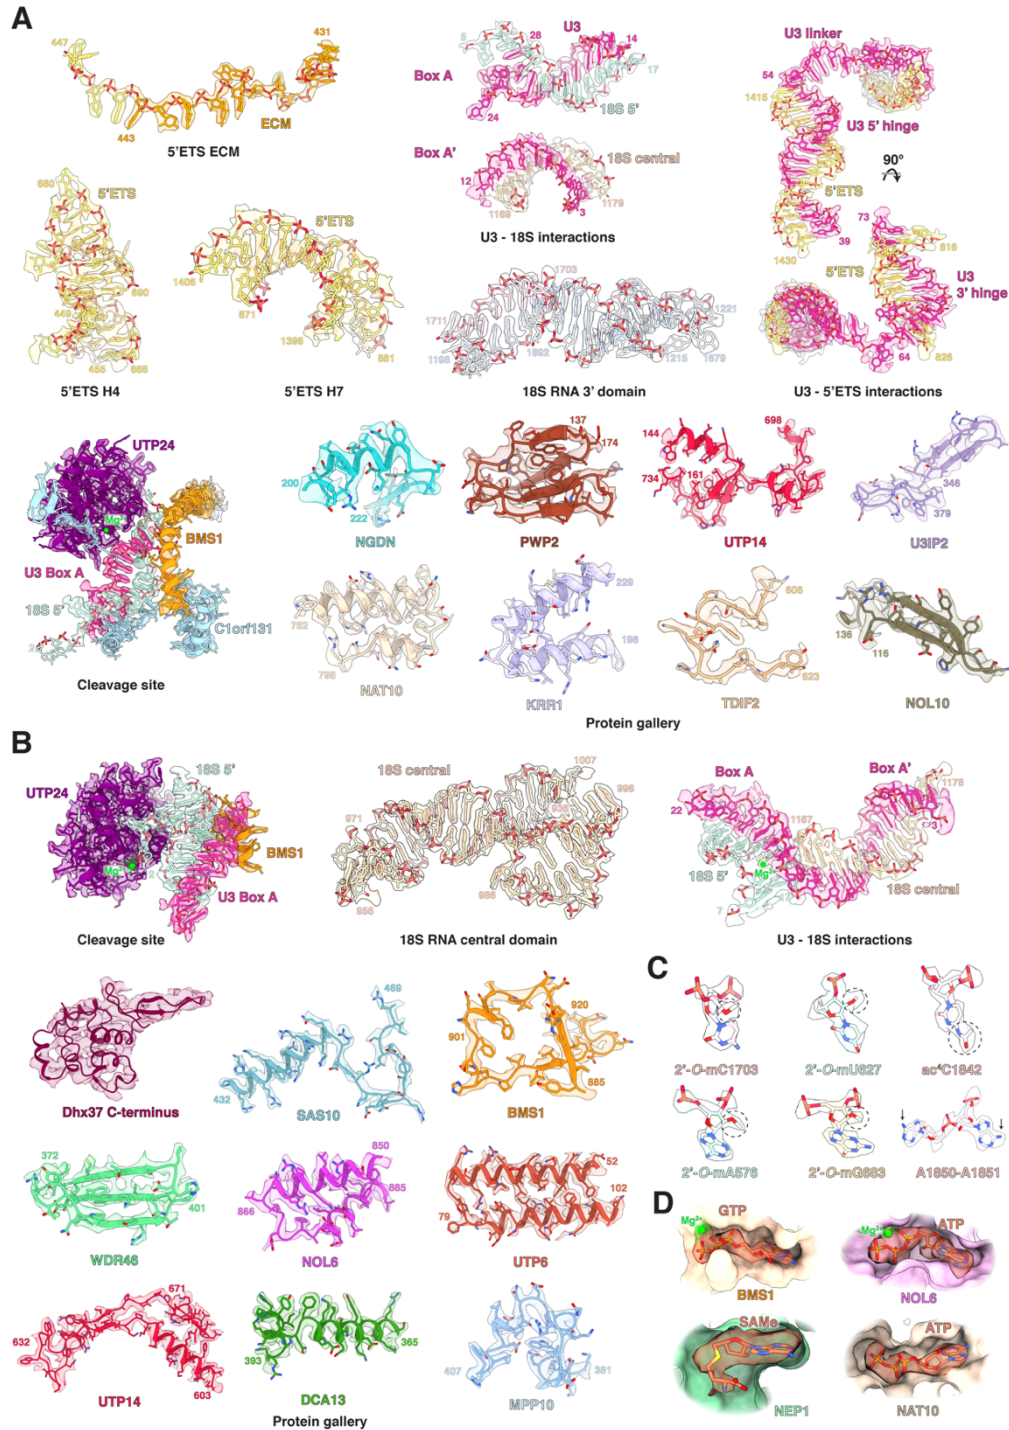

**Fig. S10. Representative cryo-EM densities.**

Selection of representative densities for assembly factors and RNAs present in (A) state pre-A1 and (B) state post-A1. (C) Modified RNA bases displayed in their respective EM densities with C1842 acetylated by NAT10 and A1850-1851 not yet modified by DIM1. The arrows indicate that A1850-A1851 are not modified. (D) Nucleotides and co-factors bound to assembly factors displayed in their respective EM densities. Densities are illustrated as continuous transparent volumes and models are shown as ribbons and sticks.

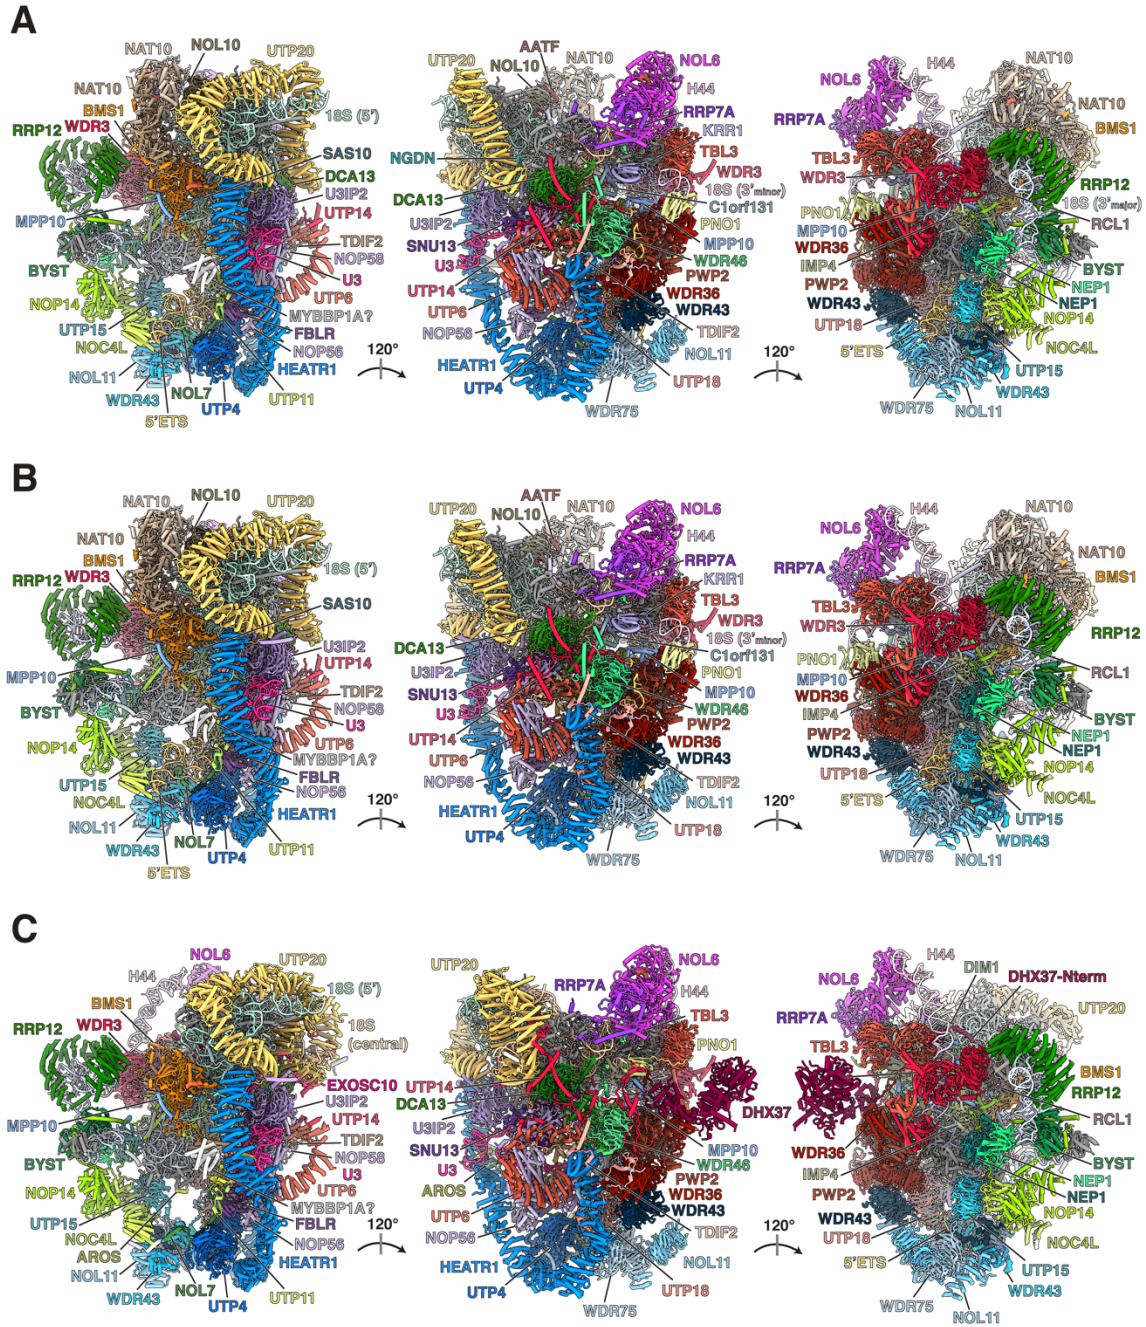

**Fig. S11. Nucleolar maturation of human SSU processomes.**  
 Three states of the human SSU processome in different views with labeled assembly factors. (A) pre-A1 (B) pre-A1\* and (C) post-A1

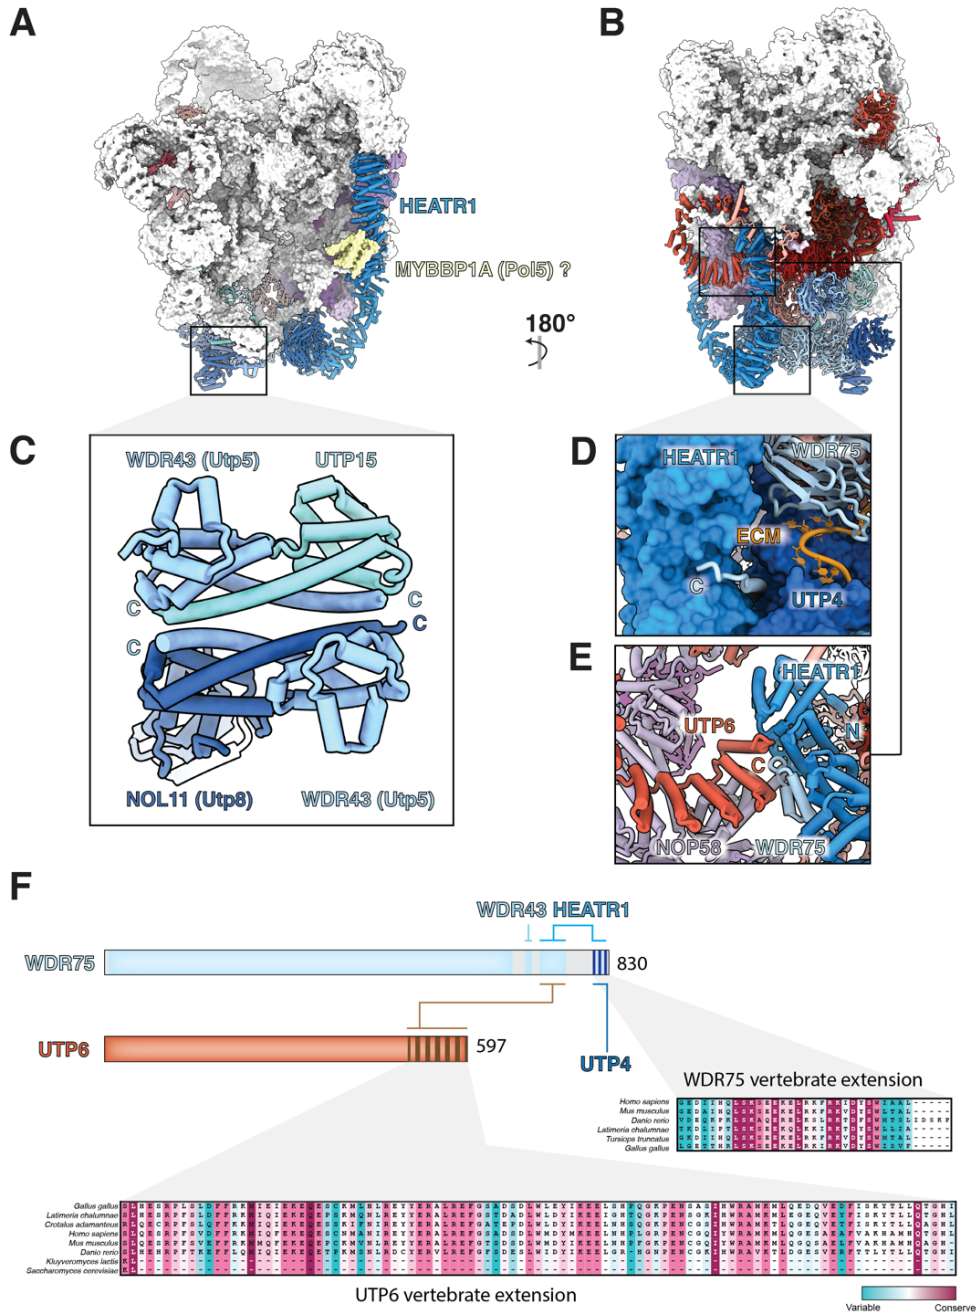

**Fig. S12. Vertebrate adaptations of UtpA and UtpB.**

(A, B) Two views of the human SSU processome in state post-A1 with UtpA, UtpB, and the U3 snoRNP colored in shades of blue, red and purple respectively. A tentatively assigned protein (MYBBP1A/Pol5) is indicated in yellow. (C) Detailed view of the tetramerization module of human UtpA that involves two copies of WDR43 (Utp5 in yeast). (D, E) Vertebrate-specific extensions of the C-termini of WDR75 (D) and UTP6, which recognizes the HEATR1/WDR75 complex (E). (F) Schematic illustrations of WDR75 and UTP6 and their interaction partners. Vertebrate-specific extensions of WDR75 and UTP6 are highlighted with darker shaded bars and corresponding multiple sequence alignments for these regions.

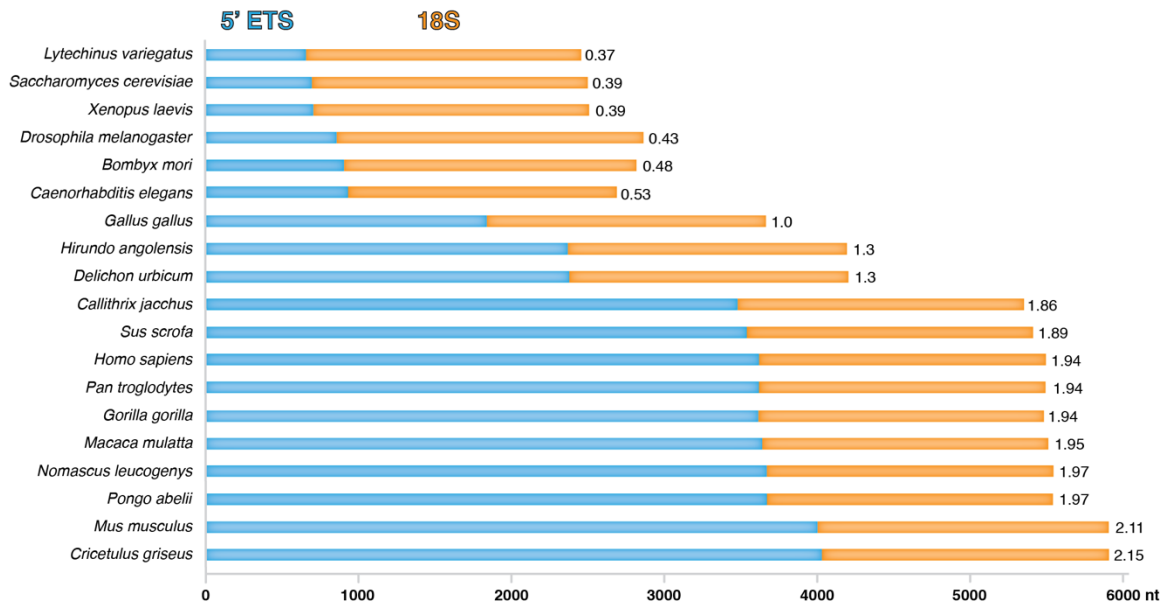

**Fig. S13. Evolutionary expansion of the 5' external transcribed spacer.**

Bar chart representing the length in nucleotides (nt) of the 5' external transcribed spacer (5' ETS; blue) versus mature 18S rRNA (orange) in different eukaryotic species. The ratio for each species (blue/orange) is denoted at the end of its respective bar.



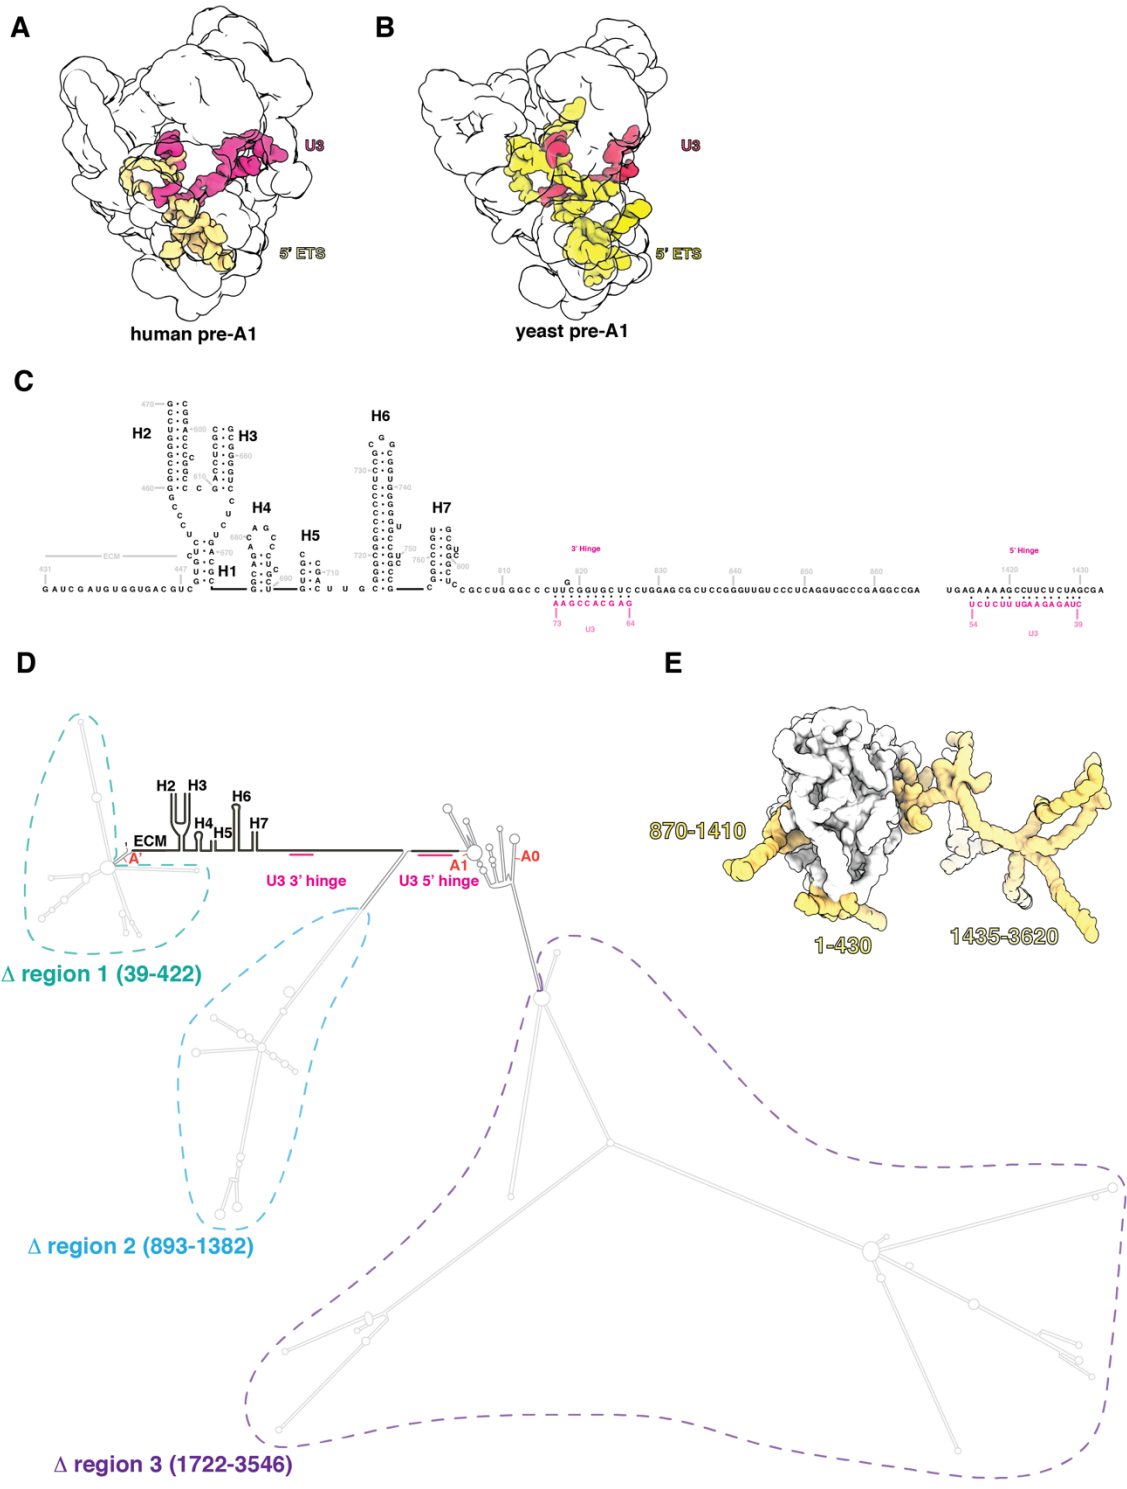

**Fig. S14. Architecture and truncations of the human 5' ETS.**

(A, B) Architectural views of human (A; this study) and yeast (B; PDB 5WLC) SSU processomes in state pre-A1 with 5' ETS (shades of yellow) and U3 snoRNA (shades of red/pink) shown. (C) Sequence and secondary structure of the built 5' ETS sequence in the human pre-A1 model (black) with base pairing U3 3' and 5' hinges (pink). (D) Secondary

structure of the full-length human 5' ETS rRNA with cleavage sites (A', A0 and A1; red) and U3 snoRNA binding regions (pink) shown. Sections (regions 1-3) that are truncated in functional studies are indicated by color-coded dashed lines. (E) Architectural view of the human SSU processome with a putative 3D model for the entire 5' ETS. Putative secondary structures for flexible regions (D) were obtained using the ViennaRNA package (75) and corresponding 3D models (E) were obtained using RNAcomposer (76).

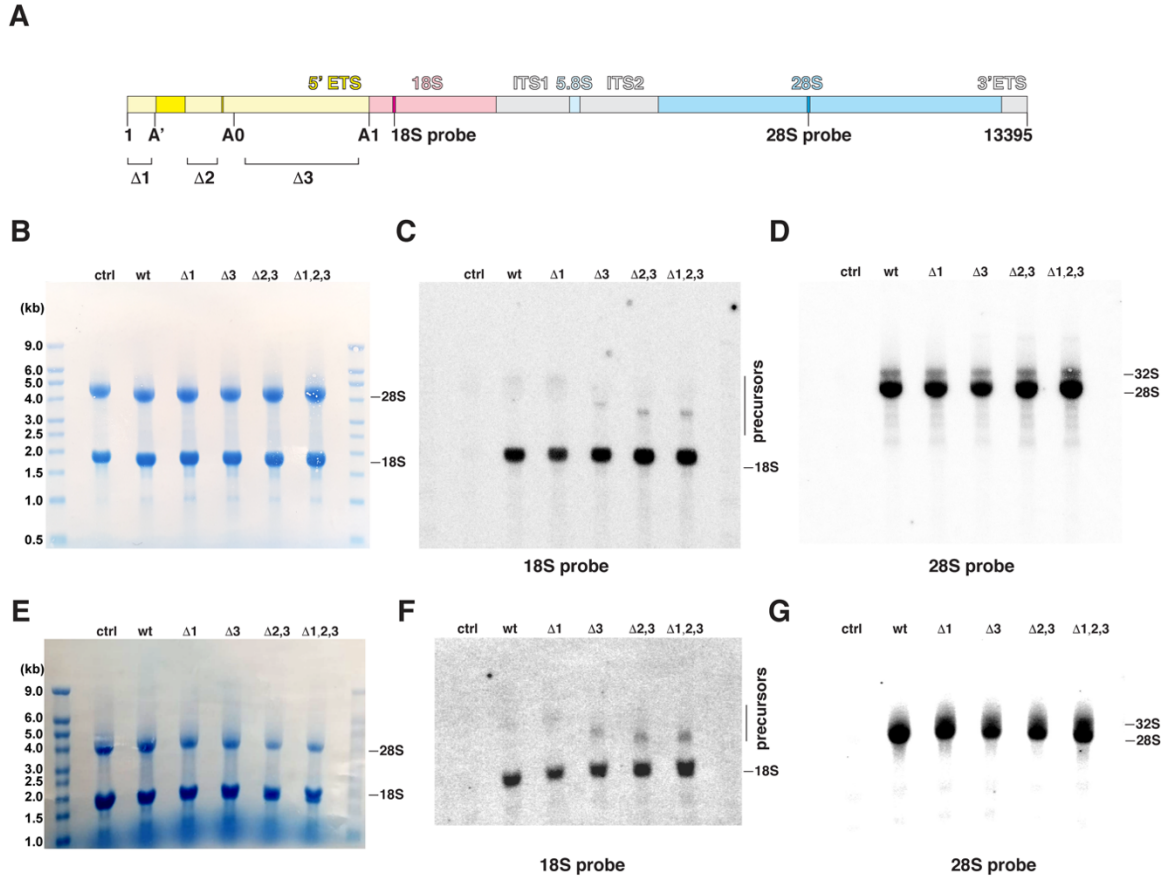

**Fig. S15. Functional studies of recombinant human rDNA loci.**

(A) Schematic representation of a human ribosomal RNA transcript showing truncations ( $\Delta 1$ ,  $\Delta 2$ ,  $\Delta 3$ ) within the 5' external transcribed spacer (5' ETS). Unique sequences inserted in the 18S and 28S transcripts can be recognized by the 18S probe and 28S probe, respectively. (B) Methylene blue staining showing 18S and 28S RNA bands detected from a non-transfected control (ctrl), or cells transfected with wild-type (wt, full-length rDNA plasmid) or four plasmids harboring truncations ( $\Delta 1$ ,  $\Delta 3$ ,  $\Delta 2,3$  and  $\Delta 1,2,3$ ). (C) Northern blot analysis using the 18S probe showing bands corresponding to the mature 18S rRNA and its precursors (black line). (D) Northern blot analysis using the 28S probe showing bands corresponding to the mature 28S rRNA and its precursor, the 32S pre-rRNA. (E, F, G) Biological replicate of (B, C, D).



post-A1 state via four peptide motifs (I – IV). **(B, C)** Structures of the exosome-bound yeast SSU processomes before (state D; panel B) or after cleavage at site A1 (state post-A1; panel C) with identified difference density corresponding to Rrp6 shown in pink. **(D)** Multiple sequence alignment of the human EXOSC10 “lasso” region and homologs highlighting universal presence of peptide motifs I-III and vertebrate-specific presence of motif IV. **(E)** Schematic comparison of yeast Fcf2 and human TDIF2. Darker shades of orange indicate built segments of TDIF2. A black box denotes the location of the putative human AIM motif. Multiple sequence alignment of a region in human TDIF2 containing a putative vertebrate-specific AIM motif.

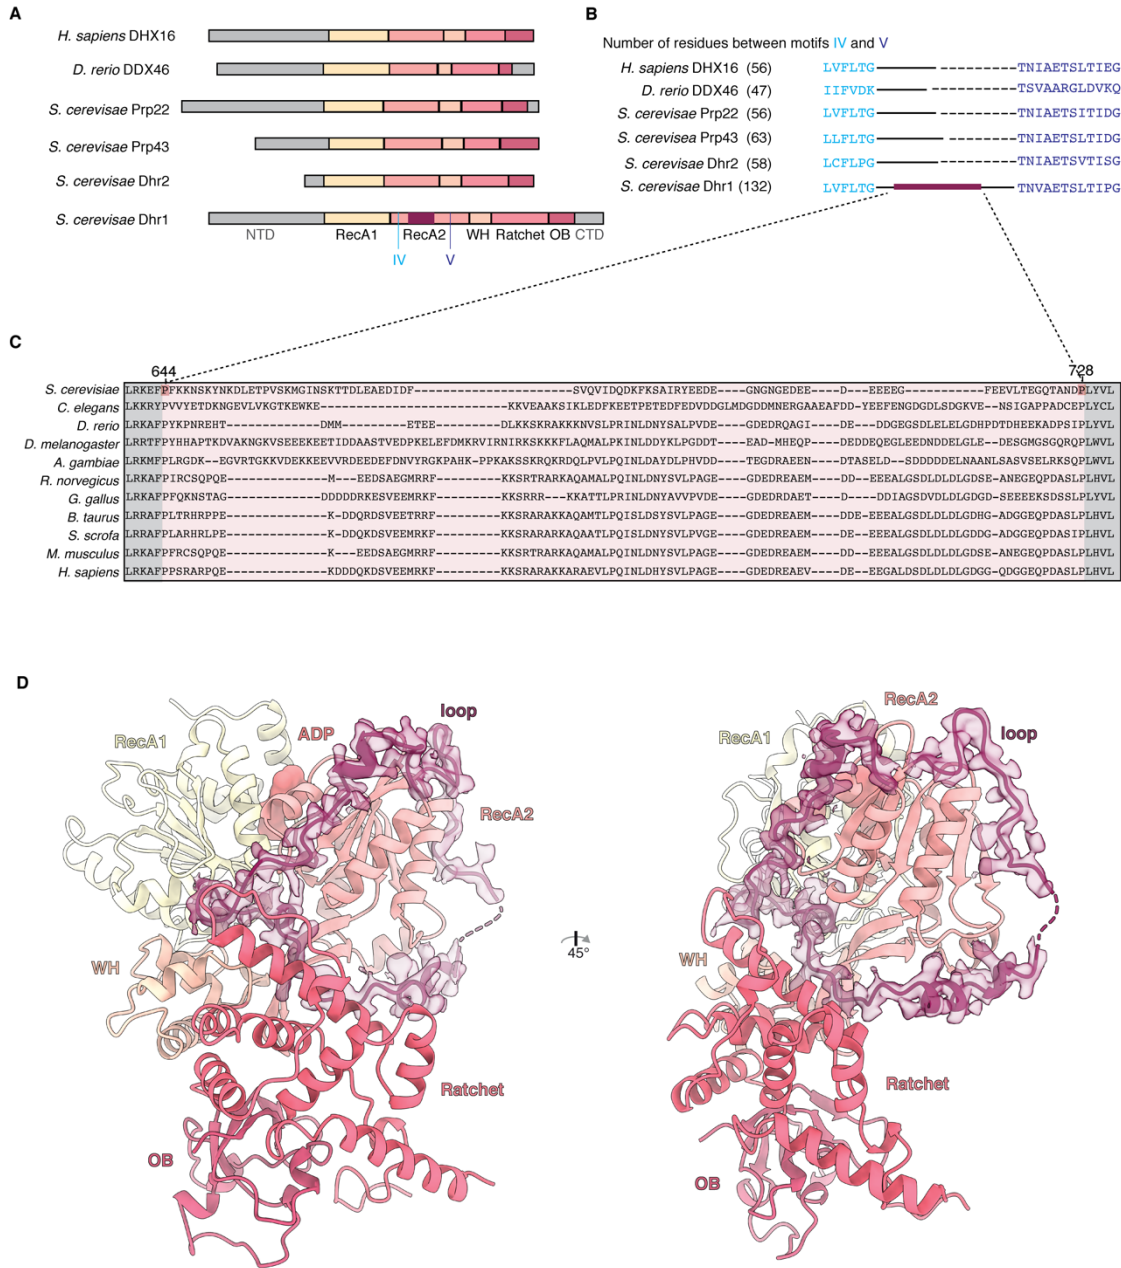

**Fig. S17. Structural analysis of Dhr1.**

(A) Comparison of DEAH-box helicases highlights the presence of a Dhr1-specific loop in the RecA2 domain between motifs IV and V. (B) Analysis of sequence lengths between motifs IV and V in DEAH-box helicases. (C) Multiple sequence alignment of the auto-inhibitory loop with Dhr1 enzymes. (D) Two views of the yeast Dhr1 core with density corresponding to the auto-inhibitory loop shown.

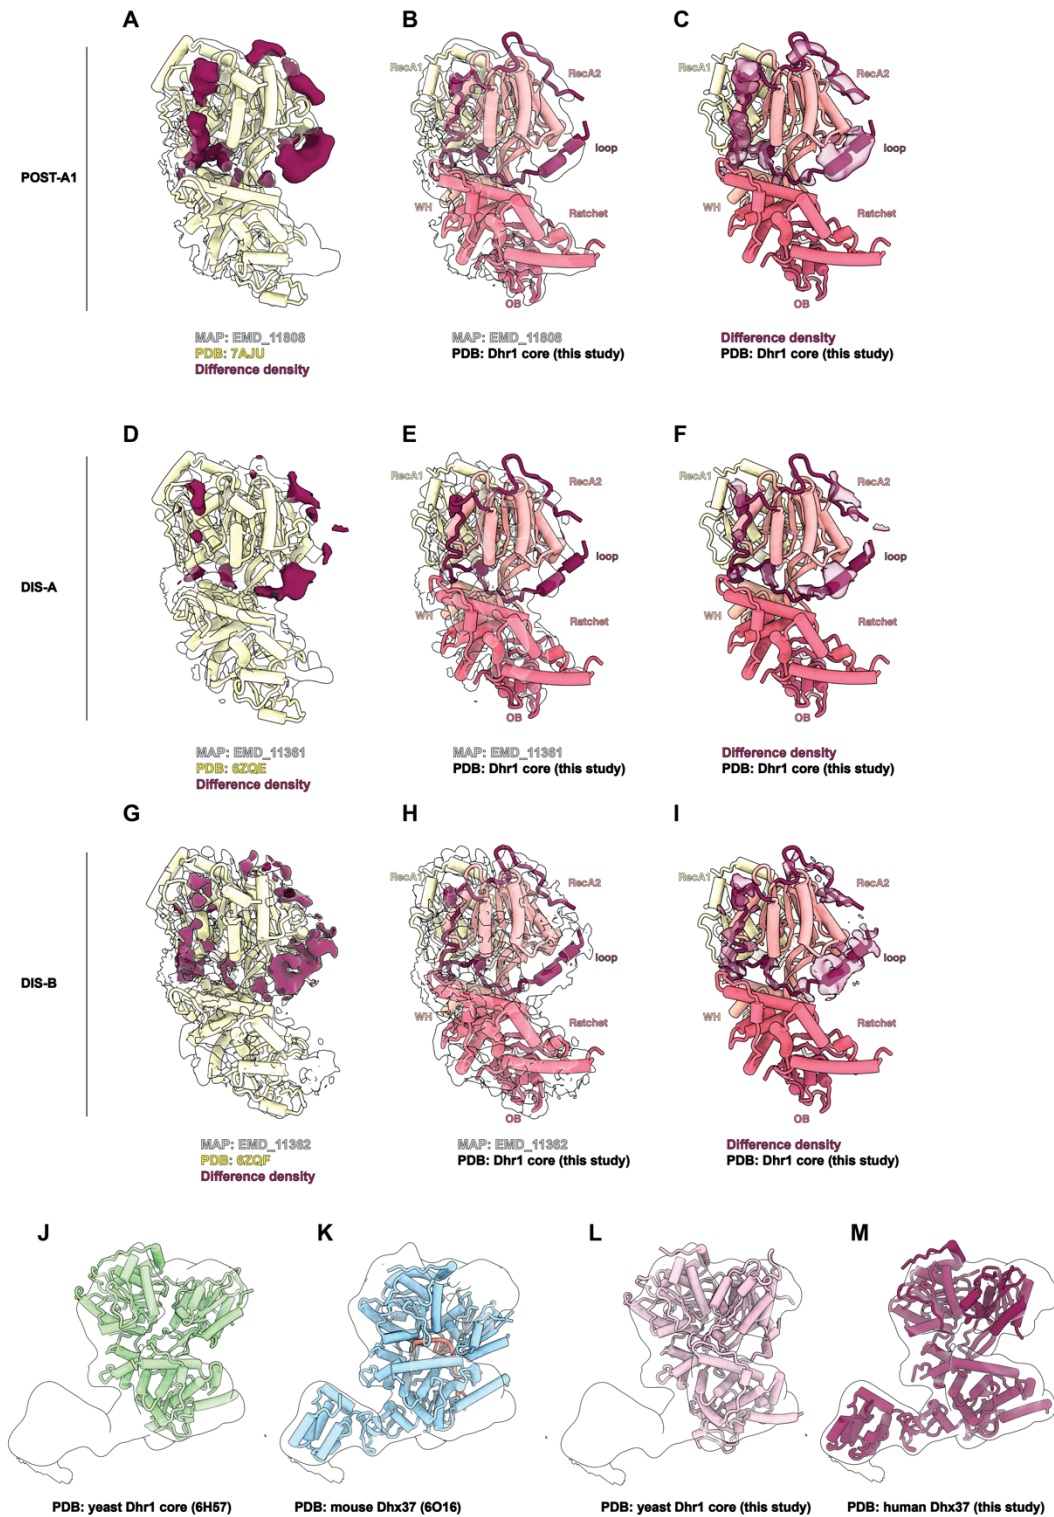

**Fig. S18. Auto-inhibition of the DEAH-box helicase Dhr1/Dhx37.**

(A-C) Analysis of Dhr1 in the yeast SSU processome state post-A1. (A) Original model (yellow) and map (transparent) as well as difference density (map vs model; dark red) are shown. (B) Dhr1 core structure (this study) docked in the yeast SSU processome state post-

A1. (C) Dhr core structure (this study) shown with difference density from panel A. (D-F) Analysis of Dhr1 in the yeast SSU processome state DIS-A. (D) Original model (yellow) and map (transparent) as well as difference density (map vs model; dark red) are shown. (E) Dhr1 core structure (this study) docked in the yeast SSU processome state DIS-A. (F) Dhr core structure (this study) shown with difference density from panel D. (G-I) Analysis of Dhr1 in the yeast SSU processome state DIS-B. (G) Original model (yellow) and map (transparent) as well as difference density (map vs model; dark red) are shown. (H) Dhr1 core structure (this study) docked in the yeast SSU processome state DIS-B. (I) Dhr core structure (this study) shown with difference density from panel G. (J-M) Fitting of Dhr1 structures into the human SSU processome in state post-A1 (this study) with yeast apo Dhr1 core (PDB 6H57, J), RNA-bound mouse DHX37 (K), yeast Dhr1 core (this study, L) and human DHX37 (this study, M).



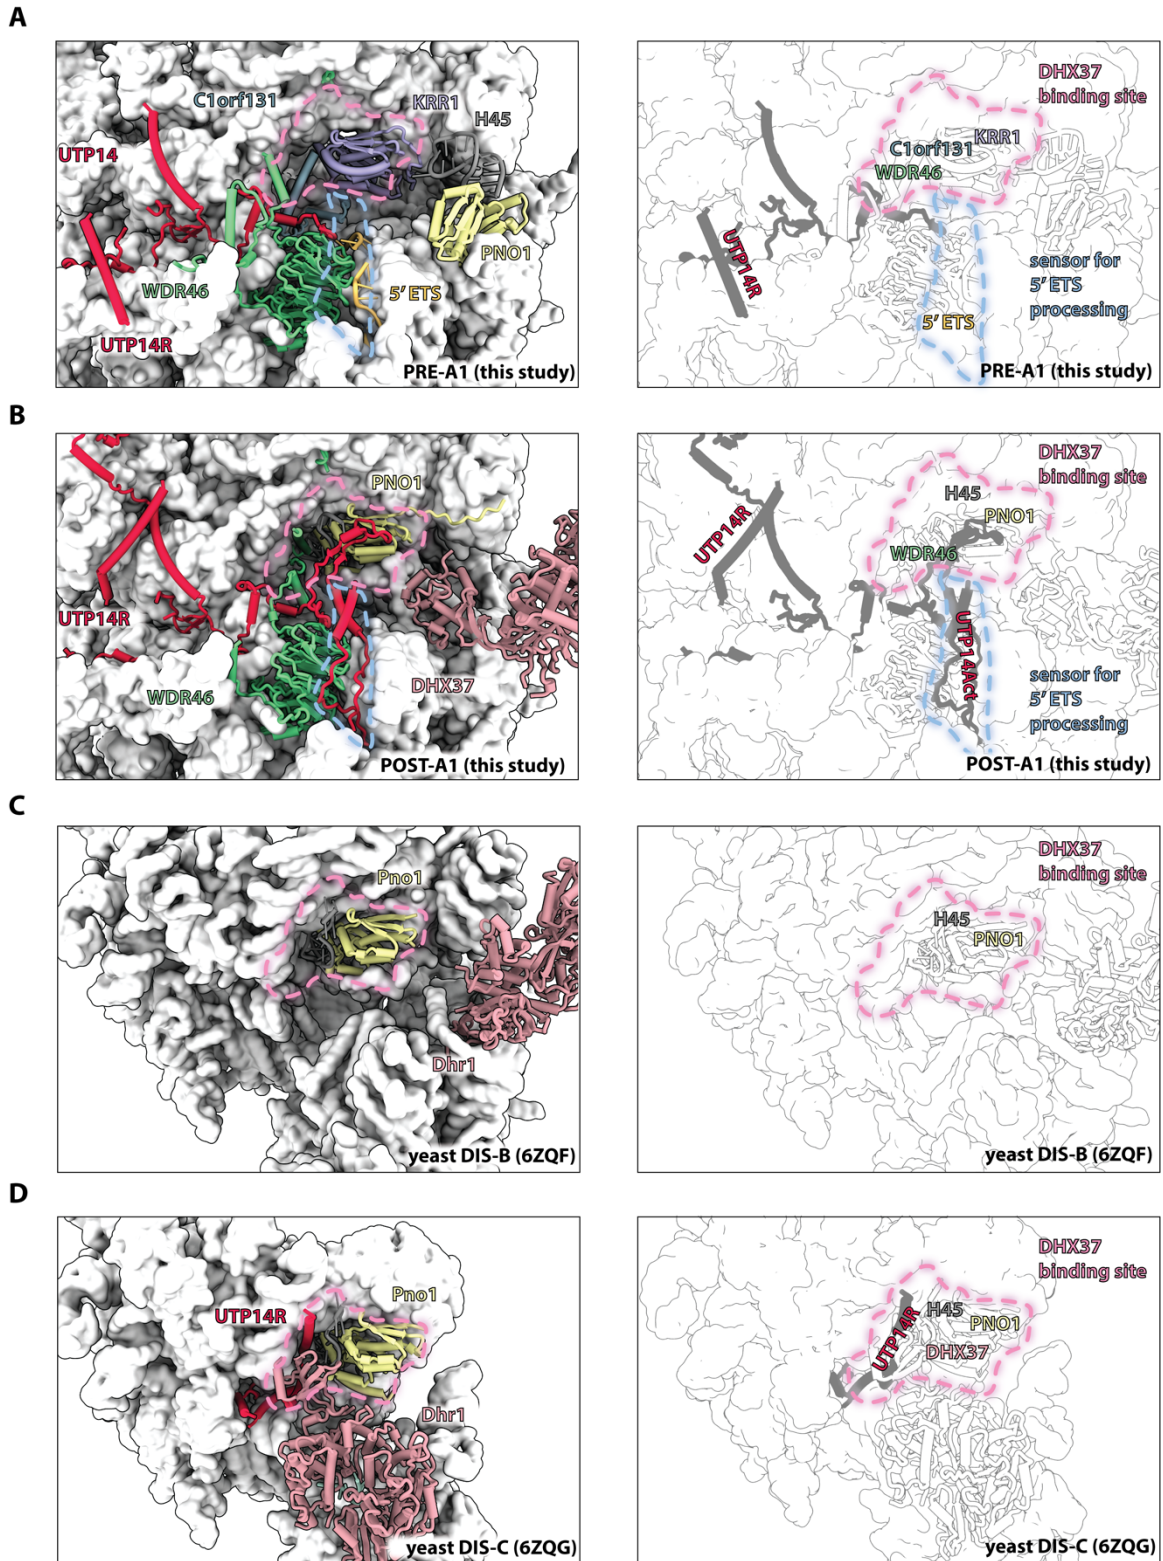

**Fig. S19. Molecular control of UTP14 and DHX37.**

Chronology of structural changes in the maturation of the SSU that control DHX37 activity and localization. Left Panels: Models of pre-ribosomal particles displaying factors

involved in DHX37 regulation. The DHX37 binding site and the sensor for 5' ETS processing are demarcated with dashed lines in pink and blue respectively. Right panels: Simplified schematics showing major structural changes with respect to the DHX37 binding site (dashed pink line) (**A**) Human state pre-A1, (**B**) Human state post-A1, (**C**) yeast DIS-B (PDB: 6ZQF), and (**D**) yeast DIS-C (PDB: 6ZQG).

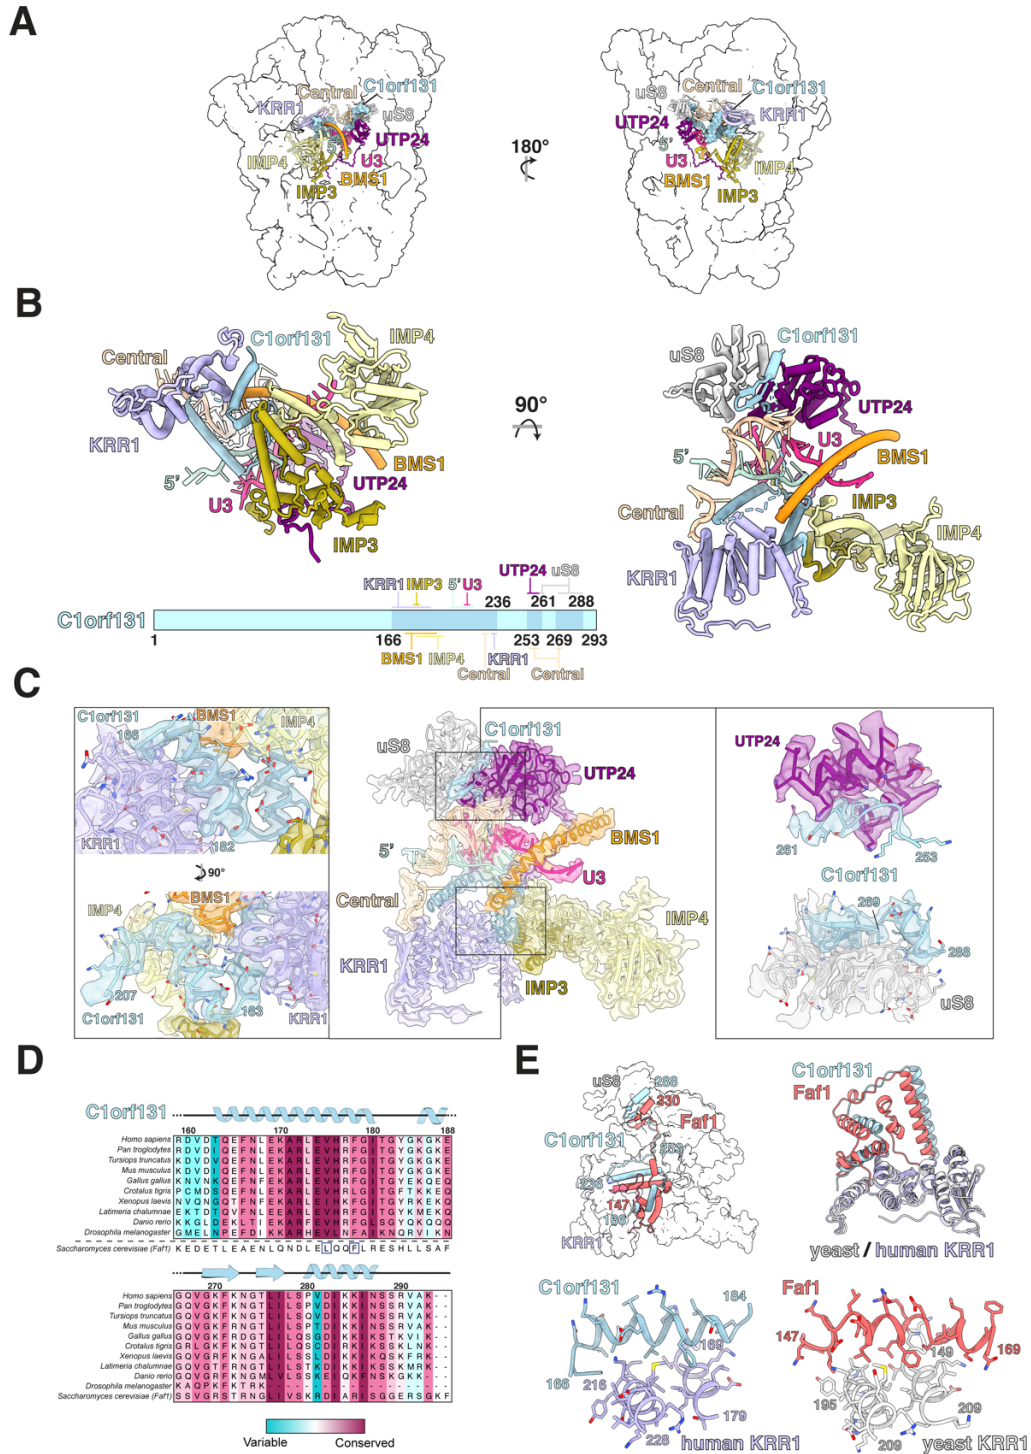

**Fig. S20. Functional architecture of C1orf131.**

(A) Location of C1orf131 and proximal proteins and RNAs within state pre-A1. (B) Two views of C1orf131 and the cluster of neighboring proteins and RNA. A schematic of C1orf131 (cyan) highlights ordered regions (blue) and their interaction partners. (C) Detailed views highlighting the interactions between C1orf131 and KRR1 (left) and UTP24 and uS8 (right). Proteins and corresponding densities for all factors are color-

coded. **(D)** Multiple sequence alignments and secondary structures of the segments of C1orf131 interacting with KRR1 (top) and uS8 (bottom). The sequence of yeast homolog Faf1 is shown below. **(E)** Top: Comparisons of the topology of human C1orf131 (cyan, within state pre-A1) and yeast Faf1 (red, PDB: 6ke6). Bottom: Comparison of the interface between human KRR1-C1orf131 (left) and yeast Krr1-Faf1 (right).

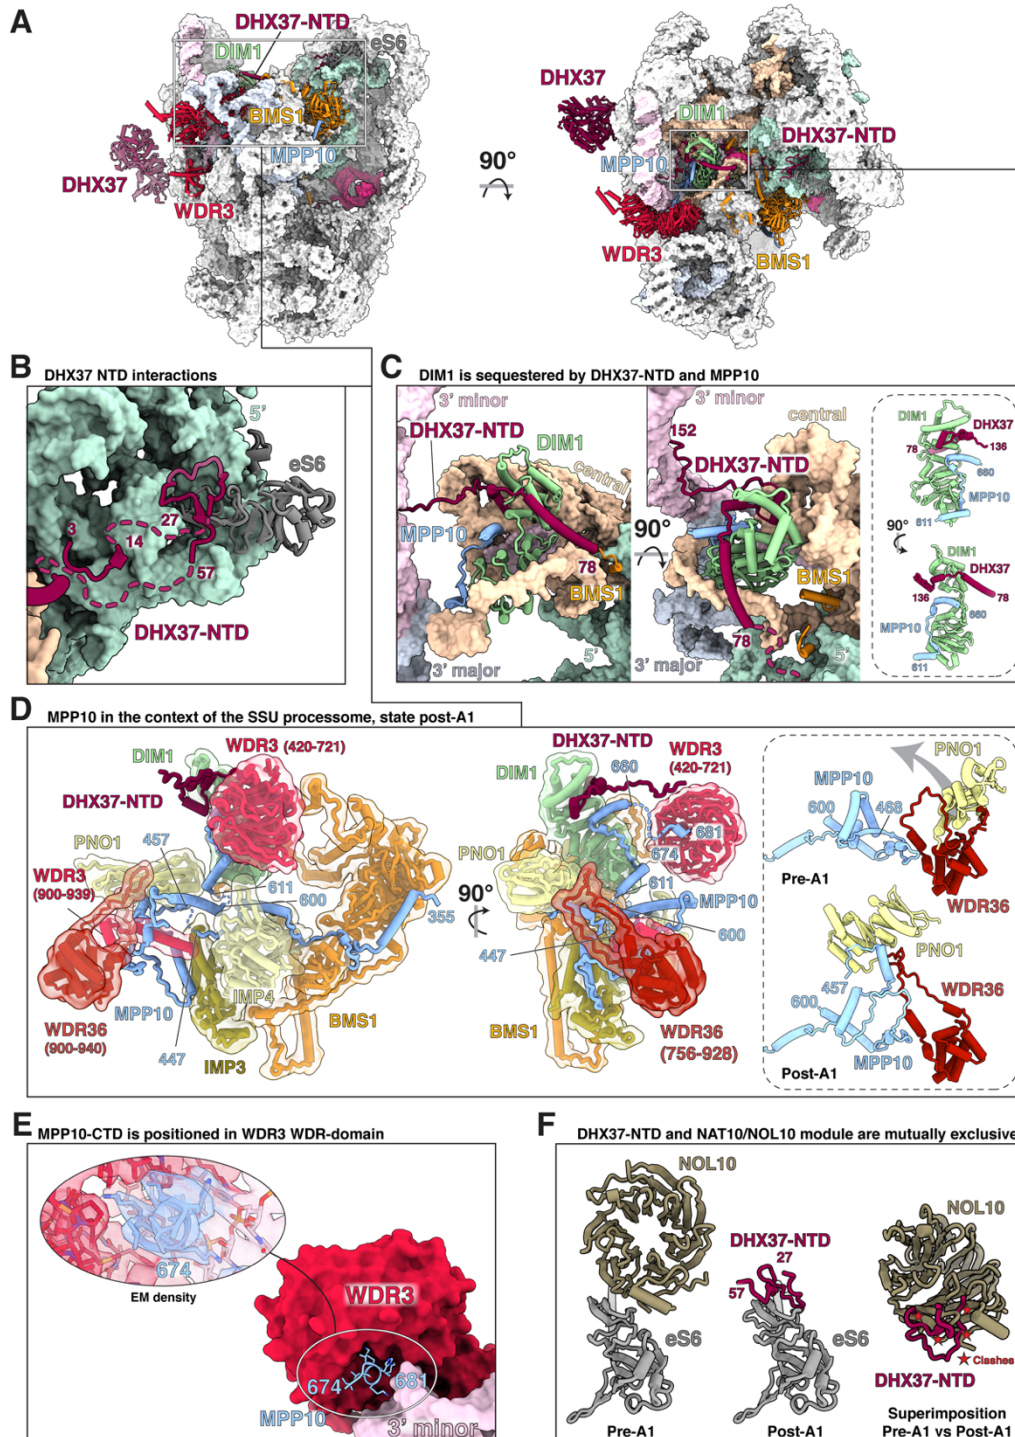

**Fig. S21. Interactions of MPP10 and DHX37 with DIM1.**

(A) Two views of the human SSU processome in state post-A1 highlighting DHX37, DIM1 and MPP10 and their interaction partners. (B) Detailed view of the interactions between DHX37-NTD (maroon) with eS6 (grey) on top of 18S rRNA (green surface). (C) Detailed views showing the sequestration of Dim1 (light green) by MPP10 (blue) and DHX37-NTD (maroon). (D) Left: Two related views of the architecture and interactions of MPP10 within

the SSU processome (post-A1). Right inset: Topological changes of MPP10, WDR36 and PNO1 from state pre-A1 (top) to post-A1 (bottom). **(E)** MPP10 (blue, ribbon) residues that bind WDR3 (red surface). Cryo-EM density of the WDR3-MPP10 interface is shown in the zoomed-in view. **(F)** Mutually exclusive binding of NOL10 (left) and DHX37-NTD (center) with eS6. Superposition of DHX37-NTD and NOL10 highlights clashes denoted by red stars (right).

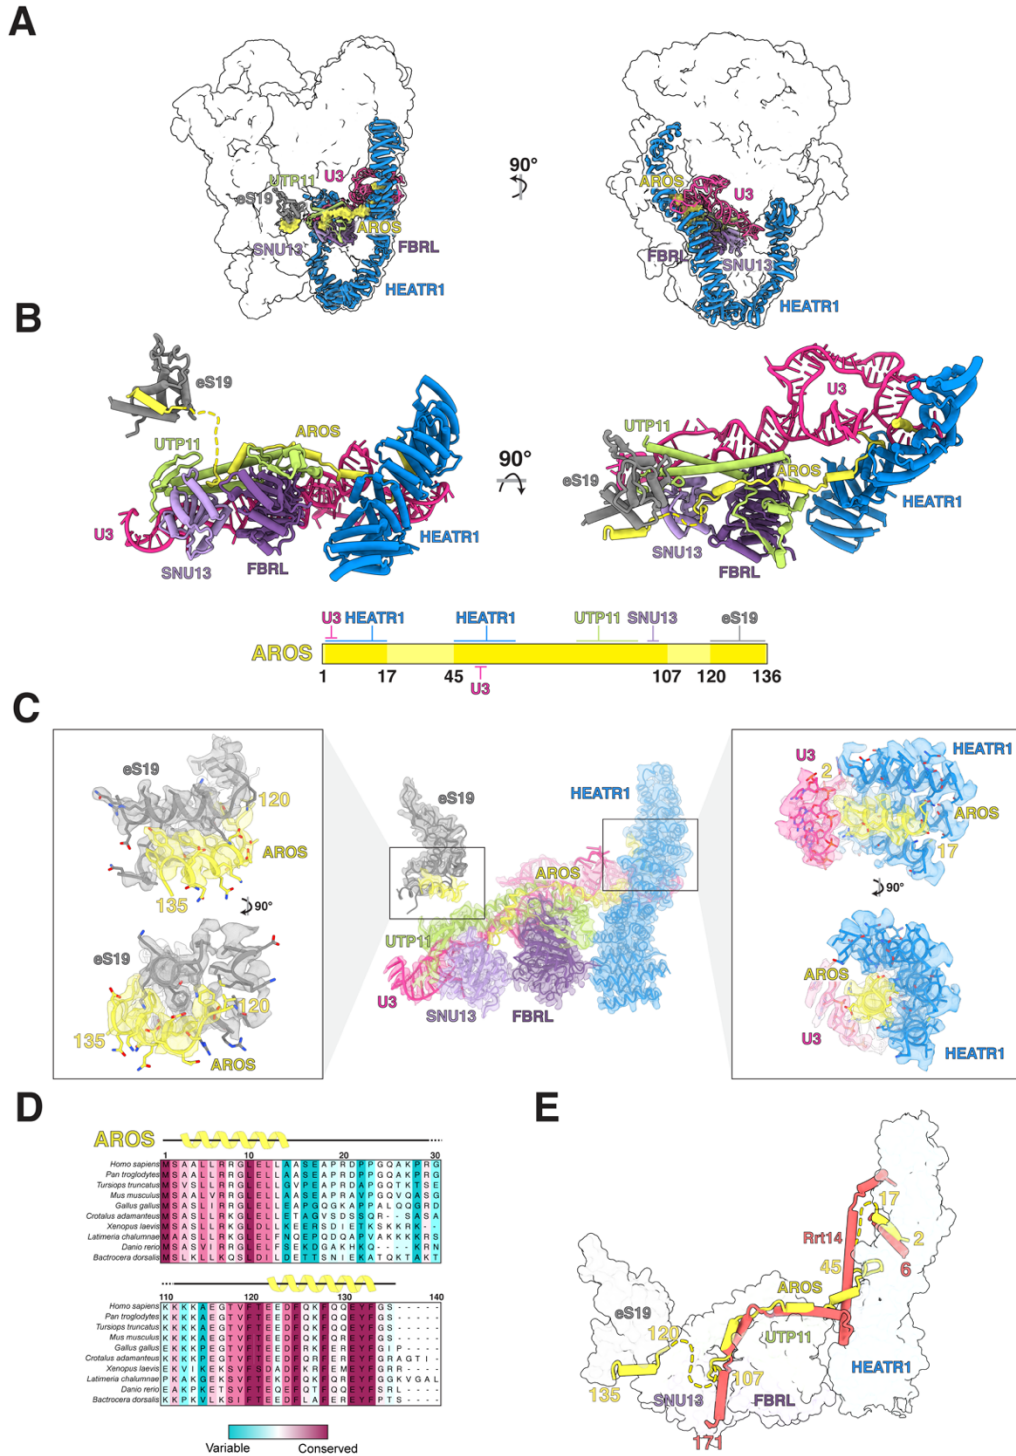

**Fig. S22. Functional architecture of AROS.**

(A) Two views of the location of AROS and its interaction partners within the human SSU processome in state post-A. (B) Two views of AROS and the cluster of neighboring factors. A schematic of AROS (light yellow) contains regions built in the post-A1 structure (yellow) and binding sites of assembly factors and U3 snoRNA. (C) Detailed views showing the C-terminus of AROS binding to eS19 (left) and the N-terminus of AROS

binding to HEATR1 and U3 snoRNA (right). **(D)** Multiple sequence alignments and secondary structures of N- and C-terminal regions of AROS visualized in (C). **(E)** Comparison of the trajectories of human AROS (within state post-A1) and yeast Rrt4 (PDB: 6lqs).



| Map                  | EMDB ID   | Resolution (FSC-0.143 criterion) | Particles (no.) | Applied B-factor | Details                                                                                                  |
|----------------------|-----------|----------------------------------|-----------------|------------------|----------------------------------------------------------------------------------------------------------|
| <b>State pre-A1</b>  |           |                                  |                 |                  |                                                                                                          |
| 5 <sup>o</sup> ETS   | EMD-24149 | 3.73                             | 24,598          | -47.60           | Focused 3D classification followed by focused refinement                                                 |
| CORE                 | EMD-24150 | 3.29                             | 37,758          | -39.23           | Focused 3D classification followed by focused refinement                                                 |
| HEATR1               | EMD-24151 | 6.37                             | 25,442          | -143.41          | Focused 3D classification followed by focused refinement                                                 |
| NAT10-NOL10          | EMD-24152 | 3.67                             | 30,201          | -56.47           | Focused 3D classification followed by focused refinement                                                 |
| NEP1                 | EMD-24153 | 3.54                             | 23,684          | -42.80           | Focused 3D classification followed by focused refinement                                                 |
| NGDN                 | EMD-24154 | 3.83                             | 21,770          | -25.00           | Focused 3D classification (2x) followed by focused refinement                                            |
| PNO1                 | EMD-24155 | 4.06                             | 33,669          | -25.00           | Focused 3D classification followed by focused refinement                                                 |
| TBL3                 | EMD-24156 | 4.09                             | 25,967          | -80.30           | Focused 3D classification followed by focused refinement                                                 |
| UTP20-CTD            | EMD-24157 | 6.30                             | 12,891          | -50.00           | Focused 3D classification followed by focused refinement                                                 |
| UTP20-NTD            | EMD-24158 | 3.42                             | 42,746          | -62.88           | Focused 3D classification followed by focused refinement                                                 |
| UTPA                 | EMD-24159 | 3.58                             | 26,589          | -53.11           | Focused 3D classification followed by focused refinement                                                 |
| UTPC                 | EMD-24160 | 4.45                             | 26,376          | -96.75           | Focused 3D classification followed by focused refinement                                                 |
| UTPC-Central         | EMD-24161 | 3.73                             | 26,376          | -56.13           | Focused 3D classification followed by focused refinement                                                 |
| Overall pre-A1       | EMD-23939 | 3.51                             | 42,142          | -44.44           | Overall 3D refinement                                                                                    |
| Composite pre-A1     | EMD-23936 | 3.60                             |                 |                  | Composite map generated with all pre-A1 and merged states focused maps using phenix.combine focused_maps |
| <b>State post-A1</b> |           |                                  |                 |                  |                                                                                                          |
| CORE                 | EMD-24162 | 2.63                             | 243,944         | -38.29           | Focused 3D classification followed by focused refinement                                                 |
| DHX37                | EMD-24163 | 4.23                             | 40,473          | 0.00             | Signal subtraction, Focused 3D classification (2x), signal revert followed by focused refinement         |
| H44                  | EMD-24164 | 3.87                             | 59,383          | -50.00           | Focused 3D classification (3x) followed by focused refinement                                            |
| HEATR1               | EMD-24165 | 3.2                              | 165,147         | -66.58           | Focused 3D classification followed by focused refinement                                                 |
| NOL11                | EMD-24166 | 3.57                             | 84,545          | -40.00           | Focused 3D classification (2x) followed by focused refinement                                            |
| Probable MYBBP1A     | EMD-24167 | 3.71                             | 92,445          | -60.00           | Focused 3D classification followed by focused refinement                                                 |
| RPS19-AROS           | EMD-24168 | 2.99                             | 83,167          | -44.45           | Focused 3D classification followed by focused refinement                                                 |
| UTP20                | EMD-24169 | 2.72                             | 190,960         | -43.51           | Focused 3D classification followed by focused refinement                                                 |
| UTP6                 | EMD-24170 | 2.96                             | 142,747         | -39.85           | Focused 3D classification (2x) followed by focused refinement                                            |
| UTPA                 | EMD-24171 | 2.78                             | 241,976         | -48.34           | Focused 3D classification followed by focused refinement                                                 |

| Description          | EMDB ID   | Resolution (FSC-0.143 criterion) | Particles (no.) | Applied B-factor | Details                                                                                                   |
|----------------------|-----------|----------------------------------|-----------------|------------------|-----------------------------------------------------------------------------------------------------------|
| UTPC                 | EMD-24172 | 2.89                             | 345,121         | -61.37           | Focused 3D classification followed by focused refinement                                                  |
| UTPC-Central         | EMD-24173 | 2.6                              | 345,121         | -46.68           | Focused 3D classification followed by focused refinement                                                  |
| Overall post-A1      | EMD-23940 | 2.65                             | 459,775         | -47.02           | Overall 3D refinement                                                                                     |
| Composite post-A1    | EMD-23938 | 2.69                             |                 |                  | Composite map generated with all post-A1 and merged states focused maps using phenix.combine focused_maps |
| <b>Merged states</b> |           |                                  |                 |                  |                                                                                                           |
| BYST-RPS12           | EMD-24174 | 3.46                             | 62,895          | -62.37           | Focused 3D classification, merging of particles followed by focused refinement                            |
| NOC4L-NOP14          | EMD-24175 | 3.41                             | 107,006         | -64.82           | Focused 3D classification, merging of particles followed by focused refinement                            |
| RRP12-BYST           | EMD-24176 | 5.25                             | 23,288          | -60.00           | Focused 3D classification, merging of particles followed by focused refinement                            |

**Table S1. Focused, overall and composite maps statistics.**

| Subcomplex         | Chain ID | SegID          | Molecule name (human/yeast) | Total residues or bases | Domains                 | Modelled (residues range)                                                                                                                                                                                                                                            | Modeling template | Modeling method                                       | Maps used for building |
|--------------------|----------|----------------|-----------------------------|-------------------------|-------------------------|----------------------------------------------------------------------------------------------------------------------------------------------------------------------------------------------------------------------------------------------------------------------|-------------------|-------------------------------------------------------|------------------------|
| RNA                | L0       | L0             | 5'ETS rRNA                  | 3620                    |                         | atomic (431-447)                                                                                                                                                                                                                                                     |                   | Manual building                                       | UTP-A map              |
|                    | L1       | L1             | pre-18S rRNA                | 1880                    |                         | atomic (2-135, 140-196, 203-240, 246-251, 268-628, 635-655, 660-708, 720-756, 788-835, 840-868, 901-1237, 1265-1323, 1326-1341, 1345-1359, 1364-1400, 1446-1503, 1510-1516, 1520-1552, 1560-1575, 1588-1616, 1623-1692, 1696-1826, 1839-1872, +62 Mg <sup>2+</sup> ) | 5WLC/6ZQD/6ZOI    | Docked & rebuilt                                      | Core, UTP-C & H44 maps |
| Ribosomal proteins | L2       | L2             | U3 snoRNA                   | 217                     |                         | atomic (3-22, 29-40, 73-217)                                                                                                                                                                                                                                         | 5WLC/6ZQD         | Docked & rebuilt                                      | Core map               |
|                    | L3       | L3             | S18/S18 (uS13)              | 152                     |                         | atomic (3-87), poly-A (88-116)                                                                                                                                                                                                                                       | 6ZOI              | Docked & adjusted                                     | Core map               |
|                    | L4       | L4             | S4X/S4 (eS4)                | 263                     |                         | atomic (2-263)                                                                                                                                                                                                                                                       | 6ZOI              | Docked & adjusted                                     | Core map               |
|                    | L5       | L5             | S5/S5 (uS7)                 | 204                     |                         | atomic (15-204)                                                                                                                                                                                                                                                      | 6ZOI              | Docked & adjusted                                     | Core map               |
|                    | L6       | L6             | S6/S6 (eS6)                 | 249                     |                         | atomic (1-230)                                                                                                                                                                                                                                                       | 6ZOI              | Docked & adjusted                                     | Core map               |
|                    | L7       | L7             | S7/S7 (eS7)                 | 194                     |                         | atomic (8-100, 119-193)                                                                                                                                                                                                                                              | 6ZOI              | Docked & adjusted                                     | Core map               |
|                    | L8       | L8             | S8/S8 (eS8)                 | 208                     |                         | atomic (2-125, 151-206)                                                                                                                                                                                                                                              | 6ZOI              | Docked & adjusted                                     | Core map               |
|                    | L9       | L9             | S9/S9 (uS4)                 | 194                     |                         | atomic (2-181)                                                                                                                                                                                                                                                       | 6ZOI              | Docked & adjusted                                     | Core map               |
|                    | LC       | LC             | S16/S16 (uS9)               | 146                     |                         | atomic (5-140)                                                                                                                                                                                                                                                       | 6ZOI              | Docked & adjusted                                     | Core map               |
|                    | LD       | LD             | S11/S11 (uS17)              | 158                     |                         | atomic (2-152)                                                                                                                                                                                                                                                       | 6ZOI              | Docked & adjusted                                     | Core map               |
|                    | LF       | LF             | S24/S24 (eS24)              | 133                     |                         | atomic (1-126)                                                                                                                                                                                                                                                       | 6ZOI              | Docked & adjusted                                     | Core map               |
|                    | LG       | LG             | S28/S28 (eS28)              | 69                      |                         | atomic (7-68)                                                                                                                                                                                                                                                        | 6ZOI              | Docked & adjusted                                     | Core map               |
|                    | SR       | SR             | S23/S23 (uS12)              | 143                     |                         | atomic (2-142)                                                                                                                                                                                                                                                       | 6ZOI              | Docked & adjusted                                     | Core map               |
|                    | NF       | NF             | S13/S13 (uS15)              | 151                     |                         | atomic (2-150)                                                                                                                                                                                                                                                       | 6ZOI              | Docked & adjusted                                     | Core map               |
|                    | NG       | NG             | S14/S14 (uS11)              | 151                     |                         | atomic (25-151)                                                                                                                                                                                                                                                      | 6ZOI              | Docked & adjusted                                     | Core map               |
|                    | NM       | NM             | S3A/S1 (eS1)                | 264                     |                         | atomic (10-233)                                                                                                                                                                                                                                                      | 6ZOI              | Docked & adjusted                                     | Core map               |
|                    | NO       | NO             | S15A/S22 (uS8)              | 130                     |                         | atomic (2-130)                                                                                                                                                                                                                                                       | 6ZOI              | Docked & adjusted                                     | Core map               |
|                    | NP       | NP             | S19/S19 (eS19)              | 145                     |                         | atomic (2-145)                                                                                                                                                                                                                                                       | 6ZOI              | Docked & adjusted                                     | S19 map                |
|                    | NQ       | NQ             | S27/S27 (eS27)              | 84                      |                         | atomic (2-83, Zn <sup>2+</sup> )                                                                                                                                                                                                                                     | 6ZOI              | Docked & adjusted                                     | Core map               |
|                    | NT       | NT             | S27A/S31 (eS31)             | 156                     |                         | atomic (92-149, Zn <sup>2+</sup> )                                                                                                                                                                                                                                   | 6ZOI              | Docked & adjusted                                     | Core map               |
| LA                 | LA       | S12/S12 (eS12) | 132                         |                         | atomic (11-130)         | 5AJO                                                                                                                                                                                                                                                                 | Docked & adjusted | Core map                                              |                        |
| NU                 | NU       | S17/S17 (eS17) | 135                         |                         | atomic (5-64)           | 6ZOI                                                                                                                                                                                                                                                                 | Docked & adjusted | Core map                                              |                        |
| UTP-A              | LH       | LH             | WDR75/Utp17                 | 830                     | Tandem WDR40 CTD        | atomic (7-671)<br>atomic (692-703, 716-759, 803-827)                                                                                                                                                                                                                 | 5WLC/6ZQD         | Deeptraccer, homology model & manual building         | UTP-A map              |
|                    | LI       | LI             | NOL11/Utp8                  | 719                     | WDR40 CTD               | atomic (152-161, 165-183, 189-195, 205-234, 242-255, 262-277)<br>atomic (286-303, 310-322), poly-A (8-48, 59-92, 104-147, 325-346)<br>atomic (354-360, 396-515, 577-718)                                                                                             | 5WLC/6ZQD         | Deeptraccer, homology model & manual building         | NOL11 map              |
|                    | LJ       | LJ             | UTP15/Utp15                 | 518                     | WDR40 CTD               | atomic (2-13, 21-318)<br>atomic (343-494)                                                                                                                                                                                                                            | 5WLC/6ZQD         | Deeptraccer, homology model & manual building         | UTP-A map              |
|                    | LK       | LK             | WDR43/Utp5                  | 677                     | CTD                     | atomic (463-580)                                                                                                                                                                                                                                                     | 5WLC/6ZQD         | Homology model & manual building                      | UTP-A map              |
|                    | LL       | LL             | WDR43/Utp5                  | 677                     | WDR40 Linker CTD        | atomic (9-49, 93-322, 331-375)<br>atomic (376-413)<br>atomic (456-580, 594-604)                                                                                                                                                                                      | 5WLC/6ZQD         | Deeptraccer & manual building                         | UTP-A map              |
|                    | LN       | LN             | UTP4/Utp4                   | 686                     | Tandem WDR40 CTD        | atomic (2-623, 638-686)                                                                                                                                                                                                                                              | 5WLC/6ZQD         | Homology model & manual building                      | UTP-A map              |
|                    | LM       | LM             | HEATR1/Utp10                | 2144                    | HEAT repeat             | atomic (2-1166, 1202-1361, 1368-1428, 1438-1476, 1495-1653)<br>atomic (1662-1877, 1889-1924, 1932-2007, 2013-2055, 2059-2144)                                                                                                                                        | 5WLC/6ZQD         | Deeptraccer, homology model & manual building         | HEATR1 map             |
| UTP-B              | LO       | LO             | PWP2/Utp1                   | 919                     | Tandem WDR40 CTD        | atomic (2-227, 271-588, 606-731)<br>atomic (732-880)                                                                                                                                                                                                                 | 5WLC/6ZQD         | Homology model & manual building                      | Core map               |
|                    | LP       | LP             | UTP6/Utp6                   | 597                     | Helical repeat          | atomic (1-200, 213-283, 297-339, 346-597)                                                                                                                                                                                                                            | 5WLC/6ZQD         | Homology model & manual building                      | UTP6 map               |
|                    | LQ       | LQ             | WDR3/Utp12                  | 943                     | Tandem WDR40 CTD        | atomic (5-223, 261-332, 341-373, 377-395, 403-526, 537-721)<br>atomic (753-782, 793-940)                                                                                                                                                                             | 5WLC/6ZQD         | Deeptraccer, homology model & manual building         | Core map               |
|                    | LR       | LR             | TBL3/Utp13                  | 808                     | Tandem WDR40 CTD        | atomic (11-457, 464-635)<br>atomic (636-788)                                                                                                                                                                                                                         | 5WLC/6ZQD         | Homology model & manual building                      | UTP-C map              |
|                    | LS       | LS             | UTP18/Utp18                 | 556                     | NTD WDR40               | atomic (62-111, 138-198)<br>atomic (215-556)                                                                                                                                                                                                                         | 5WLC/6ZQD         | Homology model & manual building                      | Core map               |
|                    | LT       | LT             | WDR36/Utp21                 | 951                     | Tandem WDR40 Linker CTD | atomic (64-425, 439-490, 495-721)<br>atomic (735-759)<br>atomic (760-948)                                                                                                                                                                                            | 5WLC/6ZQD         | Homology model & manual building                      | Core map               |
|                    | SA       | SA             | NOP56/Nop56                 | 594                     | NTD CTD                 | atomic (2-86, 90-161)<br>atomic (162-340, 353-412)                                                                                                                                                                                                                   | 5WLC/6ZQD         | Deeptraccer, homology model & manual building         | Core map               |
| U3 snoRNP          | SB       | SB             | NOP58/Nop58                 | 529                     | NTD CTD CTD extension   | atomic (1-154)<br>atomic (155-409)<br>atomic (418-438)                                                                                                                                                                                                               | 5WLC/6ZQD         | Deeptraccer, homology model & manual building         | Core map               |
|                    | SC       | SC             | FBRL/Nop1                   | 321                     |                         | atomic (85-126, 132-318)                                                                                                                                                                                                                                             | 2IPX              | Docked & adjusted                                     | Core map               |
|                    | SD       | SD             | FBRL/Nop1                   | 321                     |                         | atomic (78-126, 132-318)                                                                                                                                                                                                                                             | 2IPX              | Docked & adjusted                                     | Core map               |
|                    | SE       | SE             | hSNU13/Snu13                | 128                     |                         | atomic (6-128)                                                                                                                                                                                                                                                       | 2OZB              | Docked & adjusted                                     | Core map               |
|                    | SF       | SF             | hSNU13/Snu13                | 128                     |                         | atomic (4-128)                                                                                                                                                                                                                                                       | 2OZB              | Docked & adjusted                                     | Core map               |
|                    | SG       | SG             | U3IP2/Rtp9                  | 475                     | NTD WDR40               | atomic (73-99, 103-125)<br>atomic (126-189, 194-468)                                                                                                                                                                                                                 | 4JXM              | Homology model & manual building<br>Docked & adjusted | Core & UTP20 map       |

| Subcomplex                        | Chain ID | SegID       | Molecule name (human/yeast) | Total residues or bases | Domains                           | Modelled (residues range)                                                                                                                                                  | Modeling template                    | Modeling method                               | Maps used for building |
|-----------------------------------|----------|-------------|-----------------------------|-------------------------|-----------------------------------|----------------------------------------------------------------------------------------------------------------------------------------------------------------------------|--------------------------------------|-----------------------------------------------|------------------------|
| Other ribosome assembly factors   | LU       | LU          | DCA13/Sof1                  | 445                     | NTD<br>WDR40<br>CTD               | atomic (1-55)<br>atomic (56-355)<br>atomic (356-445)                                                                                                                       | 5WLC/6ZQD                            | Homology model & manual building              | Core map               |
|                                   | LW       | LW          | WDR46/Up7                   | 610                     | NTD<br>WDR40<br>CTD               | atomic (142-186)<br>atomic (187-475)<br>atomic (476-588)                                                                                                                   | 5WLC/6ZQD                            | Homology model & manual building              | Core map               |
|                                   | LZ       | LZ          | IMP3/Imp3                   | 184                     |                                   | atomic (2-22, 42-182)                                                                                                                                                      | 5WLC/6ZQD                            | Homology model & manual building              | Core map               |
|                                   | SH       | SH          | RCL1/Rel1                   | 373                     |                                   | atomic (6-373)                                                                                                                                                             | 5WLC/6ZQD                            | Homology model & manual building              | Core map               |
|                                   | SI       | SI          | BMS1/Bms1                   | 1282                    | GTPase<br>RCL1 interaction<br>CTD | atomic (5-27, 33-344, 844-1131, GTP, Mg <sup>2+</sup> )<br>atomic (681-695, 727-760)<br>atomic (1132-1262)                                                                 | 5WLC/6ZQD                            | Deeptracner, homology model & manual building | Core map               |
|                                   | SJ       | SJ          | NEP1/Emg1                   | 244                     |                                   | atomic (41-244, SAH)                                                                                                                                                       | 5FAI                                 | Docked & adjusted                             | NOC4-NOP14 map         |
|                                   | SK       | SK          | NEP1/Emg1                   | 244                     |                                   | atomic (41-244, SAH)                                                                                                                                                       | 5FAI                                 | Docked & adjusted                             | NOC4-NOP14 map         |
|                                   | SL       | SL          | FCF1/Up24                   | 198                     |                                   | atomic (2-16, 39-198, Zn <sup>2+</sup> , Mg <sup>2+</sup> )                                                                                                                | 5WLC/6ZQD                            | Homology model & manual building              | Core map               |
|                                   | SM       | SM          | IMP4/Imp4                   | 291                     |                                   | atomic (1-51, 72-290)                                                                                                                                                      | 5WLC/6ZQD                            | Homology model & manual building              | Core map               |
|                                   | SW       | SW          | PN01/Pno1                   | 252                     |                                   | atomic (58-252)                                                                                                                                                            | 6G18                                 | Docked & adjusted                             | Core map               |
|                                   | SP       | SP          | UTP20/Up20                  | 2785                    | Helical repeat                    | atomic (11-474, 492-662, 672-776, 787-871, 906-1282, 1292-1313)<br>atomic (1325-1435, 1446-1690, 1772-2503, 2513-2570, 2618-2723)                                          |                                      | Deeptracner & manual building                 | UTP20 map              |
|                                   | SQ       | SQ          | TDIF2/Fct2                  | 756                     |                                   | atomic (560-582, 593-611, 631-744)                                                                                                                                         | 5WLC/6ZQD                            | Homology model & manual building              | Core map               |
|                                   | SS       | SS          | UTP14/Up14                  | 771                     |                                   | atomic (63-162, 170-194, 205-246, 550-586, 590-735)                                                                                                                        |                                      | Deeptracner & manual building                 | Core map               |
|                                   | ST       | ST          | NOP14/Nop14                 | 857                     | NTD<br>Helical repeat<br>CTD      | atomic (29-86, 274-298), poly-A (186-234, 246-273)<br>atomic (463-488, 493-665, 679-745), poly-A (414-462)<br>atomic (746-772, 787-854)                                    | 5WLC/6ZQD                            | Deeptracner, homology model & manual building | Core & NOC4-NOP14 map  |
|                                   | SU       | SU          | NOC4L/Noc4L                 | 516                     | Helical repeat                    | poly-A (7-25, 27-45, 48-68, 78-124, 158-169), atomic (141-153, 177-513)                                                                                                    | 5WLC/6ZQD                            | Homology model & manual building              | NOC4-NOP14 map         |
|                                   | SY       | SY          | UTP11/Up11                  | 253                     |                                   | atomic (1-72, 89-253)                                                                                                                                                      | 5WLC/6ZQD                            | Homology model & manual building              | Core map               |
|                                   | SZ       | SZ          | BYST/Emp1                   | 437                     | Helical repeat                    | poly-A (130-164, 169-178), atomic (179-423)                                                                                                                                | 6G18                                 | Docked, adjusted & manual building            | BYST map               |
|                                   | NA       | NA          | MPP10/Mpp10                 | 681                     |                                   | atomic (355-447, 457-600, 611-660, 674-681)                                                                                                                                |                                      | Deeptracner & manual building                 | Core map               |
|                                   | NB       | NB          | SAS10/Sas10                 | 479                     |                                   | atomic (34-63, 407-479)                                                                                                                                                    | 5WLC/6ZQD                            | Homology model & manual building              | Core map               |
|                                   | NH       | NH          | NOL6/Up22                   | 1146                    |                                   | atomic (76-1141, ATP, Mg <sup>2+</sup> )                                                                                                                                   | 5WLC/6ZQD                            | Deeptracner, homology model & manual building | NOL6-RRP7 map          |
| NI                                | NI       | RRP7A/Rrp7  | 280                         |                         | atomic (18-251)                   | 5WLC/6ZQD                                                                                                                                                                  | Homology model & manual building     | NOL6-RRP7 map                                 |                        |
| ND                                | ND       | NOL7/Bud21  | 257                         |                         | atomic (168-250)                  |                                                                                                                                                                            | Deeptracner & manual building        | Core map                                      |                        |
| NR                                | NR       | RRP12/Rrp12 | 1297                        | Helical repeat          | poly-A (74-1029)                  | 6G48                                                                                                                                                                       | Docked & adjusted                    | RRP12 map                                     |                        |
| Post-A1 specific assembly factors | NS       | NS          | DHX37/Dhr1                  | 1157                    | NTD<br>Helicase<br>CTD            | atomic (3-14, 27-57, 78-152)<br>side chains trimmed (235-435, 450-493, 586-610, 612-748, 763-818, 823-905, 911-936)<br>atomic (1016-1157) / trimmed side chains (937-1015) | yeast Dhr1 core (this study)<br>6O16 | Deeptracner, homology model & manual building | Core & DHX37 map       |
|                                   | NL       | NL          | DIM1/Dim1                   | 313                     |                                   | atomic (36-313)                                                                                                                                                            | 6W6C                                 | Docked & adjusted                             | Core map               |
|                                   | LY       | LY          | AROS/?                      | 136                     |                                   | atomic (2-17, 45-107, 120-135)                                                                                                                                             |                                      | Manual building                               | Core & HEATR1 map      |
| Exosome                           | NV       | NV          | EXOSC10/Rp6                 | 885                     |                                   | atomic (815-830, 837-844, 861-871, 879-884)                                                                                                                                |                                      | Manual building                               | UTP20 map              |
|                                   | SX       | SX          | Unassigned peptide          | 228                     |                                   | poly-A (5 segments)                                                                                                                                                        |                                      | Manual building                               | Core & HEATR1-UNK map  |

**Table S2. Summary of model building for the human SSU processome in state post-A1.**

| Subcomplex         | Chain ID | SegID | Molecule name (human/yeast) | Total residues or bases | Domains                 | Modelled (residues range)                                                                                                                                                                                                                                                                     | Modeling template | Modeling method                    | Maps used for building |
|--------------------|----------|-------|-----------------------------|-------------------------|-------------------------|-----------------------------------------------------------------------------------------------------------------------------------------------------------------------------------------------------------------------------------------------------------------------------------------------|-------------------|------------------------------------|------------------------|
| RNA                | L0       | L0    | 5'ETS rRNA                  | 3620                    |                         | atomic (431-470, 597-617, 657-695, 709-763, 795-806, 811-844, 850-866, 1412-1435)                                                                                                                                                                                                             |                   | Manual building                    | UTP-A & 5'ETS maps     |
|                    | N0       | N0    | 5'ETS rRNA                  | 3620                    |                         | abasic (871-881, 1396-1416)                                                                                                                                                                                                                                                                   |                   | Manual building                    | UTP-A & 5'ETS maps     |
|                    | L1       | L1    | pre-18S rRNA                | 1880                    |                         | atomic (2-40, 45-50, 55-135, 140-196, 203-240, 246-251, 268-289, 295-408, 411-471, 476-628, 635-655, 672-687, 916-1035, 1090-1148, 1169-1179, 1186-1237, 1265-1323, 1345-1359, 1364-1400, 1446-1503, 1510-1516, 1523-1551, 1588-1599, 1637-1692, 1695-1826, 1837-1860 + 19 Mg <sup>2+</sup> ) | Post-A1 state     | Docked & rebuilt                   | Core & UTP-C maps      |
|                    | L2       | L2    | U3 snoRNA                   | 217                     |                         | atomic (3-217)                                                                                                                                                                                                                                                                                |                   | Manual building                    | Core map               |
| Ribosomal proteins | L3       | L3    | S18/S18 (uS13)              | 152                     |                         | atomic (3-87), poly-A (88-116) / trimmed side chains in pre-A1*                                                                                                                                                                                                                               | Post-A1 state     | Docked & adjusted                  | Core map               |
|                    | L4       | L4    | S4X/S4 (eS4)                | 263                     |                         | atomic (2-263)                                                                                                                                                                                                                                                                                | Post-A1 state     | Docked & adjusted                  | Core map               |
|                    | L5       | L5    | S5/S5 (uS7)                 | 204                     |                         | atomic (15-204)                                                                                                                                                                                                                                                                               | Post-A1 state     | Docked & adjusted                  | Core map               |
|                    | L6       | L6    | S6/S6 (eS6)                 | 249                     |                         | atomic (1-78, 91-230)                                                                                                                                                                                                                                                                         | Post-A1 state     | Docked & adjusted                  | Core map               |
|                    | L7       | L7    | S7/S7 (eS7)                 | 194                     |                         | atomic (8-100, 119-193)                                                                                                                                                                                                                                                                       | Post-A1 state     | Docked & adjusted                  | Core map               |
|                    | L8       | L8    | S8/S8 (eS8)                 | 208                     |                         | atomic (2-125, 151-206)                                                                                                                                                                                                                                                                       | Post-A1 state     | Docked & adjusted                  | Core map               |
|                    | L9       | L9    | S9/S9 (eS4)                 | 194                     |                         | atomic (11-181)                                                                                                                                                                                                                                                                               | Post-A1 state     | Docked & adjusted                  | Core map               |
|                    | LC       | LC    | S16/S16 (uS9)               | 146                     |                         | atomic (5-143)                                                                                                                                                                                                                                                                                | Post-A1 state     | Docked & adjusted                  | Core map               |
|                    | LD       | LD    | S11/S11 (uS17)              | 158                     |                         | atomic (2-148)                                                                                                                                                                                                                                                                                | Post-A1 state     | Docked & adjusted                  | Core map               |
|                    | LF       | LF    | S24/S24 (eS24)              | 133                     |                         | atomic (1-104)                                                                                                                                                                                                                                                                                | Post-A1 state     | Docked & adjusted                  | Core map               |
|                    | LG       | LG    | S28/S28 (eS28)              | 69                      |                         | atomic (7-68)                                                                                                                                                                                                                                                                                 | Post-A1 state     | Docked & adjusted                  | Core map               |
|                    | SR       | SR    | S23/S23 (uS12)              | 143                     |                         | atomic (35-142)                                                                                                                                                                                                                                                                               | Post-A1 state     | Docked & adjusted                  | Core map               |
|                    | NF       | NF    | S13/S13 (uS15)              | 151                     |                         | atomic (2-150)                                                                                                                                                                                                                                                                                | Post-A1 state     | Docked & adjusted                  | Core map               |
|                    | NG       | NG    | S14/S14 (uS11)              | 151                     |                         | atomic (25-140)                                                                                                                                                                                                                                                                               | Post-A1 state     | Docked & adjusted                  | Core map               |
|                    | NM       | NM    | S3A/S1 (eS1)                | 264                     |                         | atomic (10-233, 245-253)                                                                                                                                                                                                                                                                      | Post-A1 state     | Docked & adjusted                  | Core map               |
|                    | NO       | NO    | S15A/S22 (eS8)              | 130                     |                         | atomic (2-130)                                                                                                                                                                                                                                                                                | Post-A1 state     | Docked & adjusted                  | Core map               |
|                    | NQ       | NQ    | S27/S27 (eS27)              | 84                      |                         | atomic (2-83, Zn <sup>2+</sup> )                                                                                                                                                                                                                                                              | Post-A1 state     | Docked & adjusted                  | Core map               |
|                    | NT       | NT    | S27A/S31 (eS31)             | 156                     |                         | atomic (92-149, Zn <sup>2+</sup> ) / trimmed side chains in pre-A1*                                                                                                                                                                                                                           | Post-A1 state     | Docked & adjusted                  | Core map               |
|                    | LA       | LA    | S12/S12 (eS12)              | 132                     |                         | atomic (11-130) / trimmed side chains in pre-A1*                                                                                                                                                                                                                                              | Post-A1 state     | Docked & adjusted                  | Core map               |
|                    | NU       | NU    | S17/S17 (eS17)              | 135                     |                         | atomic (5-64) / trimmed side chains in pre-A1*                                                                                                                                                                                                                                                | Post-A1 state     | Docked & adjusted                  | Core map               |
| UTP-A              | LH       | LH    | WDR75/Utp17                 | 830                     | Tandem WDR40 CTD        | atomic (7-671)<br>atomic (692-703, 716-759, 803-827)                                                                                                                                                                                                                                          | Post-A1 state     | Docked & adjusted                  | UTP-A map              |
|                    | LI       | LI    | NOL11/Utp8                  | 719                     | WDR40 CTD               | atomic (152-161, 165-183, 189-195, 205-234, 242-255, 262-277)<br>trimmed side chains in pre-A1*<br>atomic (286-303, 310-322), poly-A (8-48, 59-92, 104-147, 325-346)<br>atomic (354-360, 396-515, 577-718)                                                                                    | Post-A1 state     | Docked & adjusted                  | UTP-A map              |
|                    | LJ       | LJ    | UTP15/Utp15                 | 518                     | WDR40 CTD               | atomic (2-318)<br>atomic (343-494)                                                                                                                                                                                                                                                            | Post-A1 state     | Docked, adjusted & manual building | UTP-A map              |
|                    | LK       | LK    | WDR43/Utp5                  | 677                     | CTD                     | atomic (463-580)                                                                                                                                                                                                                                                                              | Post-A1 state     | Docked & adjusted                  | UTP-A map              |
|                    | LL       | LL    | WDR43/Utp5                  | 677                     | WDR40 Linker CTD        | atomic (9-69, 93-322, 331-375)<br>atomic (376-413)<br>atomic (456-580, 594-604)                                                                                                                                                                                                               | Post-A1 state     | Docked & adjusted                  | UTP-A map              |
|                    | LN       | LN    | UTP4/Utp4                   | 686                     | Tandem WDR40 CTD        | atomic (2-623, 638-686)                                                                                                                                                                                                                                                                       | Post-A1 state     | Docked & adjusted                  | UTP-A map              |
|                    | LM       | LM    | HEATR1/Utp10                | 2144                    | HEAT repeat             | atomic (2-1166, 1202-1361, 1368-1428, 1438-1454, 1457-1472, 1507-1537, 1545-1595, 1598-1653, 1662-1876, 1889-1924, 1932-1970, 1979-2007, 2013-2055, 2059-2144)<br>trimmed side chains in pre-A1* (2-1119)                                                                                     | Post-A1 state     | Docked & adjusted                  | HEATR1 map             |
| UTP-B              | LO       | LO    | PWP2/Utp1                   | 919                     | Tandem WDR40 CTD        | atomic (2-239, 269-731)<br>atomic (732-880)                                                                                                                                                                                                                                                   | Post-A1 state     | Docked, adjusted & manual building | Core map               |
|                    | LP       | LP    | UTP6/Utp6                   | 597                     | Helical repeat          | atomic (1-200, 213-283, 297-339, 346-597)                                                                                                                                                                                                                                                     | Post-A1 state     | Docked & adjusted                  | Core map               |
|                    | LQ       | LQ    | WDR3/Utp12                  | 943                     | Tandem WDR40 CTD        | atomic (5-223, 261-332, 341-373, 377-395, 403-526, 537-721)<br>atomic (753-782, 793-917, 923-943)                                                                                                                                                                                             | Post-A1 state     | Docked & adjusted                  | Core map               |
|                    | LR       | LR    | TBL3/Utp13                  | 808                     | Tandem WDR40 CTD        | atomic (11-457, 464-635) / trimmed side chains in pre-A1*<br>atomic (636-788)                                                                                                                                                                                                                 | Post-A1 state     | Docked & adjusted                  | TBL3 map               |
|                    | LS       | LS    | UTP18/Utp18                 | 556                     | NTD WDR40               | atoms (57-112, 138-198)<br>atoms (215-556)                                                                                                                                                                                                                                                    | Post-A1 state     | Docked & adjusted                  | Core map               |
|                    | LT       | LT    | WDR36/Utp21                 | 951                     | Tandem WDR40 Linker CTD | atomic (64-721)<br>atomic (735-759)<br>atomic (760-806, 810-948)                                                                                                                                                                                                                              | Post-A1 state     | Docked & adjusted                  | Core map               |
| U3 snoRNP          | SA       | SA    | NOP56/Nop56                 | 594                     | NTD CTD                 | atomic (2-86, 90-161)<br>atomic (162-340, 353-412)                                                                                                                                                                                                                                            | Post-A1 state     | Docked & adjusted                  | Core map               |
|                    | SB       | SB    | NOP58/Nop58                 | 529                     | NTD CTD                 | atomic (1-154)<br>atomic (155-400)                                                                                                                                                                                                                                                            | Post-A1 state     | Docked & adjusted                  | Core map               |
|                    | SC       | SC    | FBRL/Nop1                   | 321                     |                         | atomic (85-126, 131-317)                                                                                                                                                                                                                                                                      | Post-A1 state     | Docked & adjusted                  | Core map               |
|                    | SD       | SD    | FBRL/Nop1                   | 321                     |                         | atomic (78-126, 131-318)                                                                                                                                                                                                                                                                      | Post-A1 state     | Docked & adjusted                  | Core map               |
|                    | SE       | SE    | SNU13/Snu13                 | 128                     |                         | atomic (6-128)                                                                                                                                                                                                                                                                                | Post-A1 state     | Docked & adjusted                  | Core map               |
|                    | SF       | SF    | SNU13/Snu13                 | 128                     |                         | atomic (4-128)                                                                                                                                                                                                                                                                                | Post-A1 state     | Docked & adjusted                  | Core map               |
|                    | SG       | SG    | U3IP2/Rtp9                  | 475                     | NTD WDR40               | atomic (73-99, 103-125) / trimmed side chains<br>atomic (126-189, 194-468)                                                                                                                                                                                                                    | Post-A1 state     | Docked & adjusted                  | Core & NGDN maps       |

| Subcomplex                       | Chain ID | SegID              | Molecule name (human/yeast) | Total residues or bases | Domains                                                   | Modelled (residues range)                                                                                                                                                                                                                             | Modeling template            | Modeling method                                                  | Maps used for building         |
|----------------------------------|----------|--------------------|-----------------------------|-------------------------|-----------------------------------------------------------|-------------------------------------------------------------------------------------------------------------------------------------------------------------------------------------------------------------------------------------------------------|------------------------------|------------------------------------------------------------------|--------------------------------|
| Other ribosome assembly factors  | LU       | LU                 | DCA13/Sof1                  | 445                     | NTD<br>WDR40<br>CTD                                       | atomic (1-55)<br>atomic (56-355)<br>atomic (356-445)                                                                                                                                                                                                  | Post-A1 state                |                                                                  | Core map                       |
|                                  | LW       | LW                 | WDR46/Ulp7                  | 610                     | NTD<br>WDR40<br>CTD                                       | atomic (95-186)<br>atomic (187-475)<br>atomic (476-588)                                                                                                                                                                                               | Post-A1 state                | Docked, adjusted & manual building                               | Core map                       |
|                                  | LZ       | LZ                 | IMP3/Imp3                   | 184                     |                                                           | atomic (2-184)                                                                                                                                                                                                                                        | Post-A1 state                | Docked, adjusted & manual building                               | Core map                       |
|                                  | SH       | SH                 | RCL1/Rcl1                   | 373                     |                                                           | atomic (6-373)                                                                                                                                                                                                                                        | Post-A1 state                | Docked & adjusted                                                | Core map                       |
|                                  | SI       | SI                 | BMS1/Bms1                   | 1282                    | GTPase<br>RCL1 interaction<br>NAT10 interaction<br>CTD    | atomic (49-355, 844-1131, GTP, Mg <sup>2+</sup> )<br>atomic (687-695, 727-760)<br>atomic (369-402, 664-681), poly-A (625-631)<br>atomic (1132-1276)                                                                                                   | Post-A1 state                | Docked, adjusted & manual building                               | Core map                       |
|                                  | SJ       | SJ                 | NEP1/Emg1                   | 244                     |                                                           | atomic (41-244, SAH) / trimmed side chains in pre-A1*                                                                                                                                                                                                 | Post-A1 state                | Docked & adjusted                                                | NEP1 map                       |
|                                  | SK       | SK                 | NEP1/Emg1                   | 244                     |                                                           | atomic (41-244, SAH)                                                                                                                                                                                                                                  | Post-A1 state                | Docked & adjusted                                                | NEP1 map                       |
|                                  | SL       | SL                 | UTP24/Utp24                 | 198                     |                                                           | atomic (7-198, Zn <sup>2+</sup> , Mg <sup>2+</sup> )                                                                                                                                                                                                  | Post-A1 state                | Docked, adjusted & manual building                               | Core map                       |
|                                  | SM       | SM                 | IMP4/Imp4                   | 291                     |                                                           | atomic (1-290)                                                                                                                                                                                                                                        | Post-A1 state                | Docked, adjusted & manual building                               | Core map                       |
|                                  | SW       | SW                 | PNO1/Pno1                   | 252                     |                                                           | atomic (58-252) / trimmed side chains in pre-A1*                                                                                                                                                                                                      | Post-A1 state                | Docked & adjusted                                                | PNO1 map                       |
|                                  | SP       | SP                 | UTP20/Utp20                 | 2785                    | Helical repeat                                            | atomic (2-474, 492-662, 672-776, 787-871, 906-1282, 1292-1313, 1325-1435)<br>atomic (1446-1690, 1772-1797, 1815-1938, 1958-2032, 2050-2066, 2077-2238)<br>trimmed side chains in pre-A1* (201-642, 1048-2238)                                         | Post-A1 state                | Docked & adjusted                                                | UTP20-Nterm & UTP20-Cterm maps |
|                                  | SQ       | SQ                 | TDF2/Fct2                   | 756                     |                                                           | atomic (548-582, 593-744)                                                                                                                                                                                                                             | Post-A1 state                | Docked, adjusted & manual building                               | Core map                       |
|                                  | SS       | SS                 | UTP14A/Utp14                | 771                     |                                                           | atomic (121-209, 217-250, 663-737)                                                                                                                                                                                                                    | Post-A1 state                | Docked, adjusted & manual building                               | Core map                       |
|                                  | ST       | ST                 | NOP14/Nop14                 | 857                     | NTD<br>Helical repeat<br>CTD                              | atomic (29-86, 274-298), poly-A (186-234, 246-273) / trimmed side chains in pre-A1*<br>atomic (463-488, 493-665, 679-745), poly-A (414-462) / trimmed side chains in pre-A1*<br>atomic (746-772, 787-854)                                             | Post-A1 state                | Docked, adjusted & manual building                               | Core & NOC4-NOP14 maps         |
|                                  | SU       | SU                 | NOC4L/Noc4L                 | 516                     | Helical repeat                                            | poly-A (7-25, 27-45, 48-68, 78-124, 158-169), atomic (141-153, 177-513)<br>trimmed side chains in pre-A1*                                                                                                                                             | Post-A1 state                | Docked & adjusted                                                | NOC4-NOP14 map                 |
|                                  | SY       | SY                 | UTP11/Utp11                 | 253                     |                                                           | atomic (1-126, 133-175, 185-253)                                                                                                                                                                                                                      | Post-A1 state                | Docked, adjusted & manual building                               | Core map                       |
|                                  | SZ       | SZ                 | BYST/Empl                   | 437                     | Helical repeat                                            | poly-A (130-164, 169-178), atomic (179-423) / trimmed side chains in pre-A1*                                                                                                                                                                          | Post-A1 state                | Docked                                                           | BYST map                       |
|                                  | NA       | NA                 | MPP10/Mpp10                 | 681                     |                                                           | atomic (255-463, 468-599, 674-681)                                                                                                                                                                                                                    | Post-A1 state                | Docked, adjusted & manual building                               | Core map                       |
|                                  | NB       | NB                 | SAS10/Sas10                 | 479                     |                                                           | atomic (407-479)                                                                                                                                                                                                                                      | Post-A1 state                | Docked & adjusted                                                | Core map                       |
|                                  | NH       | NH                 | NOL6/Utp22                  | 1146                    |                                                           | atomic (76-1141, ATP, Mg <sup>2+</sup> ) / trimmed side chains in pre-A1*                                                                                                                                                                             | Post-A1 state                | Docked & adjusted                                                | NOL6-RRP7 map                  |
| NI                               | NI       | RRP7A/Rrp7         | 280                         |                         | atomic (18-251) / trimmed side chains in pre-A1* (18-164) | Post-A1 state                                                                                                                                                                                                                                         | Docked & adjusted            | NOL6-RRP7 map                                                    |                                |
| ND                               | ND       | NOL7/Bud21         | 257                         |                         | atomic (169-252)                                          |                                                                                                                                                                                                                                                       | Deeptracer & manual building | Core map                                                         |                                |
| NR                               | NR       | RRP12/Rrp12        | 1297                        | Helical repeat          | poly-A (74-1029)                                          | Post-A1 state                                                                                                                                                                                                                                         | Docked                       | RRP12 map                                                        |                                |
| Pre-A1 specific assembly factors | NY       | NY                 | KRR1/Krr1                   | 381                     | KH domain<br>CTD                                          | atomic (39-246)<br>atomic (264-329)                                                                                                                                                                                                                   | SWLC                         | Homology model & manual building                                 | Core map                       |
|                                  | NJ       | NJ                 | NAT10/Kre33                 | 1025                    | NTD<br>Helicase<br>N-acetyltransferase<br>CTD             | atomic (1-77, 89-174, 178-221)<br>atomic (228-414, 423-434, 457-470)<br>atomic (471-585, 602-658, 669-751)<br>atomic (762-913)                                                                                                                        |                              | Deeptracer, de novo homology model (TrRosetta) & manual building | NAT10-NOL10 map                |
|                                  | NK       | NK                 | NAT10/Kre33                 | 1025                    | NTD<br>Helicase<br>N-acetyltransferase<br>CTD             | atomic (1-61, 91-221) / trimmed side chains in pre-A1*<br>atomic (231-434, 457-470, ATP) / trimmed side chains in pre-A1*<br>atomic (471-596, 602-657, 689-752) / trimmed side chains in pre-A1*<br>atomic (762-913) / trimmed side chains in pre-A1* |                              | Deeptracer, de novo homology model (TrRosetta) & manual building | NAT10-NOL10 map                |
|                                  | NW       | NW                 | NOL10/Emp2                  | 688                     | WDR40                                                     | atomic (7-14, 43-216, 230-358)                                                                                                                                                                                                                        |                              | Deeptracer, de novo homology model (TrRosetta) & manual building | NAT10-NOL10 map                |
|                                  | NN       | NN                 | AATP                        | 560                     |                                                           | atomic (509-550)                                                                                                                                                                                                                                      |                              | Manual building                                                  | NAT10-NOL10 map                |
|                                  | NC       | NC                 | NGDN/Lcp5 <sup>††</sup>     | 315                     |                                                           | atomic (189-282)                                                                                                                                                                                                                                      |                              | Manual building                                                  | NGDN map                       |
|                                  | NE       | NE                 | C1ORF131/Faf1               | 293                     |                                                           | atomic (166-236, 253-261, 269-288)                                                                                                                                                                                                                    |                              | BackPhyre using Faf1 sequence & Manual building                  | Core map                       |
| SX                               | SX       | Unassigned peptide |                             |                         | poly-A (2 segments)                                       | Post-A1 state                                                                                                                                                                                                                                         | Docked                       | Core & HEATR1 map                                                |                                |

† Fragment 241-263 not visible in state pre-A1\*.

†† NGDN not present in state pre-A1\*.

**Table S3. Summary of model building for the human SSU processome in state pre-A1 and pre-A1\*.**

| <b>Data collection and Processing</b>                     |                                                              |                                                              |                                                              |
|-----------------------------------------------------------|--------------------------------------------------------------|--------------------------------------------------------------|--------------------------------------------------------------|
| Microscope                                                |                                                              | FEI Titan Krios                                              |                                                              |
| Voltage (keV)                                             |                                                              | 300                                                          |                                                              |
| Camera                                                    |                                                              | Gatan K3                                                     |                                                              |
| Magnification                                             |                                                              | 64,000                                                       |                                                              |
| Pixel size at detector (Å/pixel)                          |                                                              | 1.08                                                         |                                                              |
| Total electron exposure (e <sup>-</sup> /Å <sup>2</sup> ) |                                                              | 58                                                           |                                                              |
| Exposure rate (e <sup>-</sup> /pixel/sec)                 |                                                              | 30.1                                                         |                                                              |
| Number of frames collected (no.)                          |                                                              | 45                                                           |                                                              |
| Defocus range (μm)                                        |                                                              | 0.7 - 2.7                                                    |                                                              |
| Automation software                                       |                                                              | SerialEM                                                     |                                                              |
| Micrographs collected (no.)                               |                                                              | 84,904                                                       |                                                              |
| Total extracted particles (no.)                           |                                                              | 9,297,626                                                    |                                                              |
|                                                           | <b>pre-A1</b>                                                | <b>pre-A1*</b>                                               | <b>post-A1</b>                                               |
| EMDB                                                      | EMD-23936                                                    | EMD-23937                                                    | EMD-23938                                                    |
| PDB                                                       | 7MQ8                                                         | 7MQ9                                                         | 7MQA                                                         |
| Final particle images (no.)                               | 42,142                                                       | 21,096                                                       | 459,775                                                      |
| Point-group symmetry                                      | C1                                                           | C1                                                           | C1                                                           |
| Resolution (global at FSC 0.143, Å)                       |                                                              |                                                              |                                                              |
| Raw map                                                   | 3.51                                                         | 3.87                                                         | 2.65                                                         |
| Composite map                                             | 3.60                                                         | N/A                                                          | 2.69                                                         |
| Resolution range (local at FSC0.5, Å)                     |                                                              |                                                              |                                                              |
| Raw map                                                   | 3.3-10.9                                                     | 3.5-11.7                                                     | 2.4-8.9                                                      |
| Composite map                                             | 3.4-11.4                                                     | N/A                                                          | 2.5-10.4                                                     |
| Map sharpening <i>B</i> factor (Å <sup>2</sup> )          | -44.44                                                       | -57.59                                                       | -47.02                                                       |
| <b>Model refinement</b>                                   |                                                              |                                                              |                                                              |
| Refinement package (real space)                           |                                                              | phenix.real_space_refine (1.19)                              |                                                              |
| Initial models used (PDB code)                            | 6ZOJ/5AJ0/5WLC/6ZQD/2IPX/2OZB/4JXM/5FAI/6G18/6W6C/6G4S       |                                                              |                                                              |
| Model resolution cutoff (Å)                               | 3.8                                                          | 4.0                                                          | 2.8                                                          |
| <b>Model composition</b>                                  |                                                              |                                                              |                                                              |
| Non-hydrogen atoms                                        | 245,114                                                      | 223,186                                                      | 242,409                                                      |
| Protein residues                                          | 26,636                                                       | 26,490                                                       | 26,363                                                       |
| RNA                                                       | 1780                                                         | 1780                                                         | 1828                                                         |
| Ligands                                                   | GTP 1x, ATP 2x,<br>Zn <sup>2+</sup> 3x, Mg <sup>2+</sup> 22x | GTP 1x, ATP 2x,<br>Zn <sup>2+</sup> 3x, Mg <sup>2+</sup> 22x | GTP 1x, ATP 1x,<br>Zn <sup>2+</sup> 3x, Mg <sup>2+</sup> 64x |
| <b>B-factors</b>                                          |                                                              |                                                              |                                                              |
| B-factors (Å <sup>2</sup> )                               |                                                              |                                                              |                                                              |
| Protein                                                   | 92.27                                                        | 68.95                                                        | 65.98                                                        |
| RNA                                                       | 159.83                                                       | 143.02                                                       | 93.71                                                        |
| Ligand                                                    | 80.37                                                        | 98.82                                                        | 62.19                                                        |
| <b>RMSDs</b>                                              |                                                              |                                                              |                                                              |
| Bond lengths (Å)                                          | 0.004                                                        | 0.004                                                        | 0.004                                                        |
| Bond angles (°)                                           | 0.925                                                        | 0.918                                                        | 0.920                                                        |
| <b>Validation</b>                                         |                                                              |                                                              |                                                              |
| MolProbity score                                          | 1.31                                                         | 1.28                                                         | 1.29                                                         |
| CaBLAM outliers                                           | 1.41                                                         | 1.44                                                         | 1.31                                                         |
| Clash score                                               | 5.73                                                         | 5.15                                                         | 5.16                                                         |
| Poor rotamers (%)                                         | 0.02                                                         | 0.04                                                         | 0.04                                                         |
| C-beta deviations                                         | 0                                                            | 0                                                            | 0                                                            |
| EMRinger score                                            | 1.78                                                         | 1.95                                                         | 2.69                                                         |
| <b>Ramachandran plot</b>                                  |                                                              |                                                              |                                                              |
| Favored (%)                                               | 98.08                                                        | 97.99                                                        | 97.93                                                        |
| Allowed (%)                                               | 1.92                                                         | 2.01                                                         | 2.07                                                         |
| Outliers (%)                                              | 0                                                            | 0                                                            | 0                                                            |
| <b>RNA validation</b>                                     |                                                              |                                                              |                                                              |
| Average suiteness (%)                                     | 47.8                                                         | 47.6                                                         | 49.3                                                         |
| Good sugar puckers (%)                                    | 98.15                                                        | 98.26                                                        | 98.64                                                        |

**Table S4. Cryo-EM data collection and refinement statistics.**

| Dhr1 core                                           |                         |
|-----------------------------------------------------|-------------------------|
| <b>PDB entry</b>                                    | 7MQJ                    |
| <b>Crystal form</b>                                 | P2 <sub>1</sub>         |
| Unit cell dimensions                                |                         |
| <i>a</i> , <i>b</i> , <i>c</i> (Å)                  | 41.77, 130.94, 86.08    |
| $\alpha$ , $\beta$ , $\gamma$ (°)                   | 90.00, 106.483, 90.00   |
| <b>Data collection</b>                              |                         |
| Wavelength (Å)                                      | 0.97919                 |
| Resolution (Å)                                      | 38.58-2.23 (2.31-2.23)* |
| Unique reflections                                  | 42918 (4275)            |
| <i>R</i> <sub>meas</sub> (%)                        | 9.7 (61.9)              |
| CC <sub>1/2</sub>                                   | 99.7 (78.4)             |
| Completeness (%)                                    | 99.34 (98.68)           |
| <i>I</i> / $\sigma I$                               | 11.89 (2.11)            |
| Multiplicity                                        | 3.4 (3.3)               |
| <b>Model statistics</b>                             |                         |
| <i>Model composition</i>                            |                         |
| No. atoms                                           |                         |
| Protein                                             | 6303                    |
| Ligand/ion                                          | 28                      |
| Water                                               | 284                     |
| <i>Refinement</i>                                   |                         |
| Resolution (Å)                                      | 38.58-2.23              |
| No. reflections                                     | 42910                   |
| <i>R</i> <sub>work</sub> / <i>R</i> <sub>free</sub> | 0.1794/0.2275           |
| <i>B</i> -factors                                   |                         |
| Protein                                             | 51.2                    |
| Ligand/ion                                          | 50.1                    |
| Water                                               | 43.5                    |
| <i>R.m.s. deviations:</i>                           |                         |
| Bond lengths (Å)                                    | 0.0082                  |
| Bond angles (°)                                     | 0.96                    |
| <i>Ramachandran plot:</i>                           |                         |
| favored (%)                                         | 96.35                   |
| allowed (%)                                         | 3.52                    |
| outliers (%)                                        | 0.28                    |
| Clashscore                                          | 6                       |
| Number of TLS group                                 | 5                       |

\*Values in parentheses are for highest-resolution shell.

**Table S5. X-ray data collection and refinement statistics.**



## References and Notes

1. K. E. Bohnsack, M. T. Bohnsack, Uncovering the assembly pathway of human ribosomes and its emerging links to disease. *EMBO J.* **38**, e100278 (2019). [doi:10.15252/embj.2018100278](https://doi.org/10.15252/embj.2018100278) [Medline](#)
2. D. L. J. Lafontaine, J. A. Riback, R. Bascetin, C. P. Brangwynne, The nucleolus as a multiphase liquid condensate. *Nat. Rev. Mol. Cell Biol.* **22**, 165–182 (2021). [doi:10.1038/s41580-020-0272-6](https://doi.org/10.1038/s41580-020-0272-6) [Medline](#)
3. B. Michot, J. P. Bachellerie, Secondary structure of the 5' external transcribed spacer of vertebrate pre-rRNA. Presence of phylogenetically conserved features. *Eur. J. Biochem.* **195**, 601–609 (1991). [doi:10.1111/j.1432-1033.1991.tb15743.x](https://doi.org/10.1111/j.1432-1033.1991.tb15743.x) [Medline](#)
4. M. Hunziker, J. Barandun, O. Buzovetsky, C. Steckler, H. Molina, S. Klinge, Conformational switches control early maturation of the eukaryotic small ribosomal subunit. *eLife* **8**, e45185 (2019). [doi:10.7554/eLife.45185](https://doi.org/10.7554/eLife.45185) [Medline](#)
5. R.-W. Yao, G. Xu, Y. Wang, L. Shan, P.-F. Luan, Y. Wang, M. Wu, L.-Z. Yang, Y.-H. Xing, L. Yang, L.-L. Chen, Nascent pre-rRNA sorting via phase separation drives the assembly of dense fibrillar components in the human nucleolus. *Mol. Cell* **76**, 767–783.e11 (2019). [doi:10.1016/j.molcel.2019.08.014](https://doi.org/10.1016/j.molcel.2019.08.014) [Medline](#)
6. F. Dragon, J. E. G. Gallagher, P. A. Compagnone-Post, B. M. Mitchell, K. A. Porwancher, K. A. Wehner, S. Wormsley, R. E. Settlage, J. Shabanowitz, Y. Osheim, A. L. Beyer, D. F. Hunt, S. J. Baserga, A large nucleolar U3 ribonucleoprotein required for 18S ribosomal RNA biogenesis. *Nature* **417**, 967–970 (2002). [doi:10.1038/nature00769](https://doi.org/10.1038/nature00769) [Medline](#)
7. M. Chaker-Margot, M. Hunziker, J. Barandun, B. D. Dill, S. Klinge, Stage-specific assembly events of the 6-MDa small-subunit processome initiate eukaryotic ribosome biogenesis. *Nat. Struct. Mol. Biol.* **22**, 920–923 (2015). [doi:10.1038/nsmb.3111](https://doi.org/10.1038/nsmb.3111) [Medline](#)
8. L. Zhang, C. Wu, G. Cai, S. Chen, K. Ye, Stepwise and dynamic assembly of the earliest precursors of small ribosomal subunits in yeast. *Genes Dev.* **30**, 718–732 (2016). [doi:10.1101/gad.274688.115](https://doi.org/10.1101/gad.274688.115) [Medline](#)
9. M. Kornprobst, M. Turk, N. Kellner, J. Cheng, D. Flemming, I. Koš-Braun, M. Koš, M. Thoms, O. Berninghausen, R. Beckmann, E. Hurt, Architecture of the 90S pre-ribosome: A structural view on the birth of the eukaryotic ribosome. *Cell* **166**, 380–393 (2016). [doi:10.1016/j.cell.2016.06.014](https://doi.org/10.1016/j.cell.2016.06.014) [Medline](#)
10. M. Chaker-Margot, J. Barandun, M. Hunziker, S. Klinge, Architecture of the yeast small subunit processome. *Science* **355**, eaal1880 (2017). [doi:10.1126/science.aal1880](https://doi.org/10.1126/science.aal1880) [Medline](#)
11. J. Barandun, M. Chaker-Margot, M. Hunziker, K. R. Molloy, B. T. Chait, S. Klinge, The complete structure of the small-subunit processome. *Nat. Struct. Mol. Biol.* **24**, 944–953 (2017). [doi:10.1038/nsmb.3472](https://doi.org/10.1038/nsmb.3472) [Medline](#)
12. J. Cheng, N. Kellner, O. Berninghausen, E. Hurt, R. Beckmann, 3.2-Å-resolution structure of the 90S preribosome before A1 pre-rRNA cleavage. *Nat. Struct. Mol. Biol.* **24**, 954–964 (2017). [doi:10.1038/nsmb.3476](https://doi.org/10.1038/nsmb.3476) [Medline](#)

13. J. Cheng, B. Lau, G. La Venuta, M. Ameismeier, O. Berninghausen, E. Hurt, R. Beckmann, 90S pre-ribosome transformation into the primordial 40S subunit. *Science* **369**, 1470–1476 (2020). [doi:10.1126/science.abb4119](https://doi.org/10.1126/science.abb4119) [Medline](#)
14. Y. Du, W. An, X. Zhu, Q. Sun, J. Qi, K. Ye, Cryo-EM structure of 90S small ribosomal subunit precursors in transition states. *Science* **369**, 1477–1481 (2020). [doi:10.1126/science.aba9690](https://doi.org/10.1126/science.aba9690) [Medline](#)
15. B. Lau, J. Cheng, D. Flemming, G. La Venuta, O. Berninghausen, R. Beckmann, E. Hurt, Structure of the maturing 90S pre-ribosome in association with the RNA exosome. *Mol. Cell* **81**, 293–303.e4 (2021). [doi:10.1016/j.molcel.2020.11.009](https://doi.org/10.1016/j.molcel.2020.11.009) [Medline](#)
16. M. Ameismeier, J. Cheng, O. Berninghausen, R. Beckmann, Visualizing late states of human 40S ribosomal subunit maturation. *Nature* **558**, 249–253 (2018). [doi:10.1038/s41586-018-0193-0](https://doi.org/10.1038/s41586-018-0193-0) [Medline](#)
17. M. Ameismeier, I. Zemp, J. van den Heuvel, M. Thoms, O. Berninghausen, U. Kutay, R. Beckmann, Structural basis for the final steps of human 40S ribosome maturation. *Nature* **587**, 683–687 (2020). [doi:10.1038/s41586-020-2929-x](https://doi.org/10.1038/s41586-020-2929-x) [Medline](#)
- <jrn>18. L. Tafforeau, C. Zorbas, J.-L. Langhendries, S.-T. Mullineux, V. Stamatopoulou, R. Mullier, L. Wacheul, D. L. J. Lafontaine, The complexity of human ribosome biogenesis revealed by systematic nucleolar screening of Pre-rRNA processing factors. *Mol. Cell* **51**, 539–551 (2013). [doi:10.1016/j.molcel.2013.08.011](https://doi.org/10.1016/j.molcel.2013.08.011) [Medline](#)</jrn>
19. L. Badertscher, T. Wild, C. Montellese, L. T. Alexander, L. Bammert, M. Sarazova, M. Stebler, G. Csucs, T. U. Mayer, N. Zamboni, I. Zemp, P. Horvath, U. Kutay, Genome-wide RNAi screening identifies protein modules required for 40S subunit synthesis in human cells. *Cell Rep.* **13**, 2879–2891 (2015). [doi:10.1016/j.celrep.2015.11.061](https://doi.org/10.1016/j.celrep.2015.11.061) [Medline](#)
20. K. I. Farley-Barnes, K. L. McCann, L. M. Ogawa, J. Merkel, Y. V. Surovtseva, S. J. Baserga, Diverse regulators of human ribosome biogenesis discovered by changes in nucleolar number. *Cell Rep.* **22**, 1923–1934 (2018). [doi:10.1016/j.celrep.2018.01.056](https://doi.org/10.1016/j.celrep.2018.01.056) [Medline](#)
21. S. B. Sondalle, S. J. Baserga, Human diseases of the SSU processome. *Biochim. Biophys. Acta* **1842**, 758–764 (2014). [doi:10.1016/j.bbadis.2013.11.004](https://doi.org/10.1016/j.bbadis.2013.11.004) [Medline](#)
22. S. K. Natchiar, A. G. Myasnikov, H. Kratzat, I. Hazemann, B. P. Klaholz, Visualization of chemical modifications in the human 80S ribosome structure. *Nature* **551**, 472–477 (2017). [doi:10.1038/nature24482](https://doi.org/10.1038/nature24482) [Medline](#)
23. M. Taoka, Y. Nobe, Y. Yamaki, K. Sato, H. Ishikawa, K. Izumikawa, Y. Yamauchi, K. Hirota, H. Nakayama, N. Takahashi, T. Isobe, Landscape of the complete RNA chemical modifications in the human 80S ribosome. *Nucleic Acids Res.* **46**, 9289–9298 (2018). [doi:10.1093/nar/gky811](https://doi.org/10.1093/nar/gky811) [Medline](#)
24. J. Cheng, J. Baßler, P. Fischer, B. Lau, N. Kellner, R. Kunze, S. Griesel, M. Kallas, O. Berninghausen, D. Strauss, R. Beckmann, E. Hurt, Thermophile 90S pre-ribosome structures reveal the reverse order of co-transcriptional 18S rRNA subdomain integration. *Mol. Cell* **75**, 1256–1269.e7 (2019). [doi:10.1016/j.molcel.2019.06.032](https://doi.org/10.1016/j.molcel.2019.06.032) [Medline](#)

25. S. Kass, N. Craig, B. Sollner-Webb, Primary processing of mammalian rRNA involves two adjacent cleavages and is not species specific. *Mol. Cell. Biol.* **7**, 2891–2898 (1987). [doi:10.1128/MCB.7.8.2891](https://doi.org/10.1128/MCB.7.8.2891) [Medline](#)
26. N. J. Watkins, M. T. Bohnsack, The box C/D and H/ACA snoRNPs: Key players in the modification, processing and the dynamic folding of ribosomal RNA. *WIREs RNA* **3**, 397–414 (2012). [doi:10.1002/wrna.117](https://doi.org/10.1002/wrna.117) [Medline](#)
27. Q. Sun, X. Zhu, J. Qi, W. An, P. Lan, D. Tan, R. Chen, B. Wang, S. Zheng, C. Zhang, X. Chen, W. Zhang, J. Chen, M.-Q. Dong, K. Ye, Molecular architecture of the 90S small subunit pre-ribosome. *eLife* **6**, e22086 (2017). [doi:10.7554/eLife.22086](https://doi.org/10.7554/eLife.22086) [Medline](#)
28. E. V. Wasmuth, C. D. Lima, The Rrp6 C-terminal domain binds RNA and activates the nuclear RNA exosome. *Nucleic Acids Res.* **45**, 846–860 (2017). [doi:10.1093/nar/gkw1152](https://doi.org/10.1093/nar/gkw1152) [Medline](#)
29. M. Thoms, E. Thomson, J. Baßler, M. Gnädig, S. Griesel, E. Hurt, The exosome is recruited to RNA substrates through specific adaptor proteins. *Cell* **162**, 1029–1038 (2015). [doi:10.1016/j.cell.2015.07.060](https://doi.org/10.1016/j.cell.2015.07.060) [Medline](#)
30. F. M. Boneberg, T. Brandmann, L. Kobel, J. van den Heuvel, K. Bargsten, L. Bammert, U. Kutay, M. Jinek, Molecular mechanism of the RNA helicase DHX37 and its activation by UTP14A in ribosome biogenesis. *RNA* **25**, 685–701 (2019). [doi:10.1261/rna.069609.118](https://doi.org/10.1261/rna.069609.118) [Medline](#)
31. A. Roychowdhury, C. Joret, G. Bourgeois, V. Heurgué-Hamard, D. L. J. Lafontaine, M. Graille, The DEAH-box RNA helicase Dhr1 contains a remarkable carboxyl terminal domain essential for small ribosomal subunit biogenesis. *Nucleic Acids Res.* **47**, 7548–7563 (2019). [doi:10.1093/nar/gkz529](https://doi.org/10.1093/nar/gkz529) [Medline](#)
32. J. Zhu, X. Liu, M. Anjos, C. C. Correll, A. W. Johnson, Utp14 recruits and activates the RNA helicase Dhr1 to undock U3 snoRNA from the preribosome. *Mol. Cell. Biol.* **36**, 965–978 (2016). [doi:10.1128/MCB.00773-15](https://doi.org/10.1128/MCB.00773-15) [Medline](#)
33. P. Choudhury, P. Hackert, I. Memet, K. E. Sloan, M. T. Bohnsack, The human RNA helicase DHX37 is required for release of the U3 snoRNP from pre-ribosomal particles. *RNA Biol.* **16**, 54–68 (2019). [doi:10.1080/15476286.2018.1556149](https://doi.org/10.1080/15476286.2018.1556149) [Medline](#)
34. G. R. Wells, F. Weichmann, D. Colvin, K. E. Sloan, G. Kudla, D. Tollervy, N. J. Watkins, C. Schneider, The PIN domain endonuclease Utp24 cleaves pre-ribosomal RNA at two coupled sites in yeast and humans. *Nucleic Acids Res.* **44**, 5399–5409 (2016). [doi:10.1093/nar/gkw213](https://doi.org/10.1093/nar/gkw213) [Medline](#)
35. K. I. Farley-Barnes, L. M. Ogawa, S. J. Baserga, Ribosomopathies: Old concepts, new controversies. *Trends Genet.* **35**, 754–767 (2019). [doi:10.1016/j.tig.2019.07.004](https://doi.org/10.1016/j.tig.2019.07.004) [Medline](#)
36. J. C. Ulirsch, J. M. Verboon, S. Kazerounian, M. H. Guo, D. Yuan, L. S. Ludwig, R. E. Handsaker, N. J. Abdulhay, C. Fiorini, G. Genovese, E. T. Lim, A. Cheng, B. B. Cummings, K. R. Chao, A. H. Beggs, C. A. Genetti, C. A. Sieff, P. E. Newburger, E. Niewiadomska, M. Matysiak, A. Vlachos, J. M. Lipton, E. Atsidaftos, B. Glader, A. Narla, P.-E. Gleizes, M.-F. O’Donohue, N. Montel-Lehry, D. J. Amor, S. A. McCarroll, A. H. O’Donnell-Luria, N. Gupta, S. B. Gabriel, D. G. MacArthur, E. S. Lander, M. Lek, L. Da Costa, D. G. Nathan, A. A. Korostelev, R. Do, V. G. Sankaran, H. T. Gazda, The

- genetic landscape of Diamond-Blackfan anemia. *Am. J. Hum. Genet.* **103**, 930–947 (2018). [doi:10.1016/j.ajhg.2018.10.027](https://doi.org/10.1016/j.ajhg.2018.10.027) [Medline](#)
37. N. Draptchinskaia, P. Gustavsson, B. Andersson, M. Pettersson, T.-N. Willig, I. Dianzani, S. Ball, G. Tchernia, J. Klar, H. Matsson, D. Tentler, N. Mohandas, B. Carlsson, N. Dahl, The gene encoding ribosomal protein S19 is mutated in Diamond-Blackfan anaemia. *Nat. Genet.* **21**, 169–175 (1999). [doi:10.1038/5951](https://doi.org/10.1038/5951) [Medline](#)
38. J. Flygare, A. Aspesi, J. C. Bailey, K. Miyake, J. M. Caffrey, S. Karlsson, S. R. Ellis, Human *RPS19*, the gene mutated in Diamond-Blackfan anemia, encodes a ribosomal protein required for the maturation of 40S ribosomal subunits. *Blood* **109**, 980–986 (2007). [doi:10.1182/blood-2006-07-038232](https://doi.org/10.1182/blood-2006-07-038232) [Medline](#)
39. J. R. P. Knight, A. E. Willis, J. Milner, Active regulator of SIRT1 is required for ribosome biogenesis and function. *Nucleic Acids Res.* **41**, 4185–4197 (2013). [doi:10.1093/nar/gkt129](https://doi.org/10.1093/nar/gkt129) [Medline](#)
40. N. Maeda, S. Toku, N. Kenmochi, T. Tanaka, A novel nucleolar protein interacts with ribosomal protein S19. *Biochem. Biophys. Res. Commun.* **339**, 41–46 (2006). [doi:10.1016/j.bbrc.2005.10.184](https://doi.org/10.1016/j.bbrc.2005.10.184) [Medline](#)
41. B. L. Ebert, J. Pretz, J. Bosco, C. Y. Chang, P. Tamayo, N. Galili, A. Raza, D. E. Root, E. Attar, S. R. Ellis, T. R. Golub, Identification of *RPS14* as a 5q- syndrome gene by RNA interference screen. *Nature* **451**, 335–339 (2008). [doi:10.1038/nature06494](https://doi.org/10.1038/nature06494) [Medline](#)
42. N. A. Paolini, M. Attwood, S. B. Sondalle, C. M. D. S. Vieira, A. M. van Adrichem, F. M. di Summa, M.-F. O'Donohue, P.-E. Gleizes, S. Rachuri, J. W. Briggs, R. Fischer, P. J. Ratcliffe, M. W. Wlodarski, R. H. Houtkooper, M. von Lindern, T. W. Kuijpers, J. D. Dinman, S. J. Baserga, M. E. Cockman, A. W. MacInnes, A ribosomopathy reveals decoding defective ribosomes driving human dysmorphism. *Am. J. Hum. Genet.* **100**, 506–522 (2017). [doi:10.1016/j.ajhg.2017.01.034](https://doi.org/10.1016/j.ajhg.2017.01.034) [Medline](#)
43. A. G. Marneros, BMS1 is mutated in aplasia cutis congenita. *PLOS Genet.* **9**, e1003573 (2013). [doi:10.1371/journal.pgen.1003573](https://doi.org/10.1371/journal.pgen.1003573) [Medline](#)
44. J. Armistead, S. Khatkar, B. Meyer, B. L. Mark, N. Patel, G. Coghlan, R. E. Lamont, S. Liu, J. Wiechert, P. A. Cattini, P. Koetter, K. Wrogemann, C. R. Greenberg, K.-D. Entian, T. Zelinski, B. Triggs-Raine, Mutation of a gene essential for ribosome biogenesis, *EMG1*, causes Bowen-Conradi syndrome. *Am. J. Hum. Genet.* **84**, 728–739 (2009). [doi:10.1016/j.ajhg.2009.04.017](https://doi.org/10.1016/j.ajhg.2009.04.017) [Medline](#)
45. P. Chagnon, J. Michaud, G. Mitchell, J. Mercier, J.-F. Marion, E. Drouin, A. Rasquin-Weber, T. J. Hudson, A. Richter, A missense mutation (R565W) in *Cirhin* (FLJ14728) in North American Indian childhood cirrhosis. *Am. J. Hum. Genet.* **71**, 1443–1449 (2002). [doi:10.1086/344580](https://doi.org/10.1086/344580) [Medline](#)
46. I. M. Slaymaker, L. Gao, B. Zetsche, D. A. Scott, W. X. Yan, F. Zhang, Rationally engineered Cas9 nucleases with improved specificity. *Science* **351**, 84–88 (2016). [doi:10.1126/science.aad5227](https://doi.org/10.1126/science.aad5227) [Medline](#)
47. J.-P. Concordet, M. Haeussler, CRISPOR: Intuitive guide selection for CRISPR/Cas9 genome editing experiments and screens. *Nucleic Acids Res.* **46**, W242–W245 (2018). [doi:10.1093/nar/gky354](https://doi.org/10.1093/nar/gky354) [Medline](#)

48. D. N. Mastronarde, Automated electron microscope tomography using robust prediction of specimen movements. *J. Struct. Biol.* **152**, 36–51 (2005). [doi:10.1016/j.jsb.2005.07.007](https://doi.org/10.1016/j.jsb.2005.07.007) [Medline](#)
49. J. Zivanov, T. Nakane, B. O. Forsberg, D. Kimanius, W. J. H. Hagen, E. Lindahl, S. H. W. Scheres, New tools for automated high-resolution cryo-EM structure determination in RELION-3. *eLife* **7**, e42166 (2018). [doi:10.7554/eLife.42166](https://doi.org/10.7554/eLife.42166) [Medline](#)
50. S. Q. Zheng, E. Palovcak, J.-P. Armache, K. A. Verba, Y. Cheng, D. A. Agard, MotionCor2: Anisotropic correction of beam-induced motion for improved cryo-electron microscopy. *Nat. Methods* **14**, 331–332 (2017). [doi:10.1038/nmeth.4193](https://doi.org/10.1038/nmeth.4193) [Medline](#)
51. K. Zhang, Gctf: Real-time CTF determination and correction. *J. Struct. Biol.* **193**, 1–12 (2016). [doi:10.1016/j.jsb.2015.11.003](https://doi.org/10.1016/j.jsb.2015.11.003) [Medline](#)
52. T. Wagner, F. Merino, M. Stabrin, T. Moriya, C. Antoni, A. Apelbaum, P. Hagel, O. Sitsel, T. Raisch, D. Prumbaum, D. Quentin, D. Roderer, S. Tacke, B. Siebolds, E. Schubert, T. R. Shaikh, P. Lill, C. Gatsogiannis, S. Raunser, SPHIRE-crYOLO is a fast and accurate fully automated particle picker for cryo-EM. *Commun. Biol.* **2**, 218 (2019). [doi:10.1038/s42003-019-0437-z](https://doi.org/10.1038/s42003-019-0437-z) [Medline](#)
53. J. Zivanov, T. Nakane, S. H. W. Scheres, Estimation of high-order aberrations and anisotropic magnification from cryo-EM data sets in RELION-3.1. *IUCrJ* **7**, 253–267 (2020). [doi:10.1107/S2052252520000081](https://doi.org/10.1107/S2052252520000081) [Medline](#)
54. T. C. Terwilliger, S. J. Ludtke, R. J. Read, P. D. Adams, P. V. Afonine, Improvement of cryo-EM maps by density modification. *Nat. Methods* **17**, 923–927 (2020). [doi:10.1038/s41592-020-0914-9](https://doi.org/10.1038/s41592-020-0914-9) [Medline](#)
55. D. Lieschner, P. V. Afonine, M. L. Baker, G. Bunkóczi, V. B. Chen, T. I. Croll, B. Hintze, L.-W. Hung, S. Jain, A. J. McCoy, N. W. Moriarty, R. D. Oeffner, B. K. Poon, M. G. Prisant, R. J. Read, J. S. Richardson, D. C. Richardson, M. D. Sammito, O. V. Sobolev, D. H. Stockwell, T. C. Terwilliger, A. G. Urzhumtsev, L. L. Videau, C. J. Williams, P. D. Adams, Macromolecular structure determination using X-rays, neutrons and electrons: Recent developments in Phenix. *Acta Crystallogr. D* **75**, 861–877 (2019). [doi:10.1107/S2059798319011471](https://doi.org/10.1107/S2059798319011471) [Medline](#)
56. P. B. Rosenthal, R. Henderson, Optimal determination of particle orientation, absolute hand, and contrast loss in single-particle electron cryomicroscopy. *J. Mol. Biol.* **333**, 721–745 (2003). [doi:10.1016/j.jmb.2003.07.013](https://doi.org/10.1016/j.jmb.2003.07.013) [Medline](#)
57. S. Chen, G. McMullan, A. R. Faruqi, G. N. Murshudov, J. M. Short, S. H. W. Scheres, R. Henderson, High-resolution noise substitution to measure overfitting and validate resolution in 3D structure determination by single particle electron cryomicroscopy. *Ultramicroscopy* **135**, 24–35 (2013). [doi:10.1016/j.ultramic.2013.06.004](https://doi.org/10.1016/j.ultramic.2013.06.004) [Medline](#)
58. J. B. Heymann, Guidelines for using Bsoft for high resolution reconstruction and validation of biomolecular structures from electron micrographs. *Protein Sci.* **27**, 159–171 (2018). [doi:10.1002/pro.3293](https://doi.org/10.1002/pro.3293) [Medline](#)
59. A. Punjani, J. L. Rubinstein, D. J. Fleet, M. A. Brubaker, cryoSPARC: Algorithms for rapid unsupervised cryo-EM structure determination. *Nat. Methods* **14**, 290–296 (2017). [doi:10.1038/nmeth.4169](https://doi.org/10.1038/nmeth.4169) [Medline](#)

60. B. Webb, A. Sali, Protein structure modeling with MODELLER. *Methods Mol. Biol.* **2199**, 239–255 (2021). [doi:10.1007/978-1-0716-0892-0\\_14](https://doi.org/10.1007/978-1-0716-0892-0_14) [Medline](#)
61. J. Pfab, N. M. Phan, D. Si, DeepTracer for fast de novo cryo-EM protein structure modeling and special studies on CoV-related complexes. *Proc. Natl. Acad. Sci. U.S.A.* **118**, e2017525118 (2021). [doi:10.1073/pnas.2017525118](https://doi.org/10.1073/pnas.2017525118) [Medline](#)
62. A. Casañal, B. Lohkamp, P. Emsley, Current developments in *Coot* for macromolecular model building of Electron Cryo-microscopy and Crystallographic Data. *Protein Sci.* **29**, 1069–1078 (2020). [doi:10.1002/pro.3791](https://doi.org/10.1002/pro.3791) [Medline](#)
63. J. Yang, I. Anishchenko, H. Park, Z. Peng, S. Ovchinnikov, D. Baker, Improved protein structure prediction using predicted interresidue orientations. *Proc. Natl. Acad. Sci. U.S.A.* **117**, 1496–1503 (2020). [doi:10.1073/pnas.1914677117](https://doi.org/10.1073/pnas.1914677117) [Medline](#)
64. P. V. Afonine, B. K. Poon, R. J. Read, O. V. Sobolev, T. C. Terwilliger, A. Urzhumtsev, P. D. Adams, Real-space refinement in PHENIX for cryo-EM and crystallography. *Acta Crystallogr. D* **74**, 531–544 (2018). [doi:10.1107/S2059798318006551](https://doi.org/10.1107/S2059798318006551) [Medline](#)
65. E. F. Pettersen, T. D. Goddard, C. C. Huang, G. S. Couch, D. M. Greenblatt, E. C. Meng, T. E. Ferrin, UCSF Chimera—A visualization system for exploratory research and analysis. *J. Comput. Chem.* **25**, 1605–1612 (2004). [doi:10.1002/jcc.20084](https://doi.org/10.1002/jcc.20084) [Medline](#)
66. E. F. Pettersen, T. D. Goddard, C. C. Huang, E. C. Meng, G. S. Couch, T. I. Croll, J. H. Morris, T. E. Ferrin, UCSF ChimeraX: Structure visualization for researchers, educators, and developers. *Protein Sci.* **30**, 70–82 (2021). [doi:10.1002/pro.3943](https://doi.org/10.1002/pro.3943) [Medline](#)
67. The PyMOL Molecular Graphics System, Version 2.0 (Schrödinger, LLC, 2017).
68. P. D. Adams, P. V. Afonine, G. Bunkóczi, V. B. Chen, I. W. Davis, N. Echols, J. J. Headd, L.-W. Hung, G. J. Kapral, R. W. Grosse-Kunstleve, A. J. McCoy, N. W. Moriarty, R. Oeffner, R. J. Read, D. C. Richardson, J. S. Richardson, T. C. Terwilliger, P. H. Zwart, *PHENIX*: A comprehensive Python-based system for macromolecular structure solution. *Acta Crystallogr. D* **66**, 213–221 (2010). [doi:10.1107/S0907444909052925](https://doi.org/10.1107/S0907444909052925) [Medline](#)
69. P. Emsley, K. Cowtan, *Coot*: Model-building tools for molecular graphics. *Acta Crystallogr. D* **60**, 2126–2132 (2004). [doi:10.1107/S0907444904019158](https://doi.org/10.1107/S0907444904019158) [Medline](#)
70. J.-H. Kim, A. T. Dilthey, R. Nagaraja, H.-S. Lee, S. Koren, D. Dudekula, W. H. Wood Iii, Y. Piao, A. Y. Ogurtsov, K. Utani, V. N. Noskov, S. A. Shabalina, D. Schlessinger, A. M. Phillippy, V. Larionov, Variation in human chromosome 21 ribosomal RNA genes characterized by TAR cloning and long-read sequencing. *Nucleic Acids Res.* **46**, 6712–6725 (2018). [doi:10.1093/nar/gky442](https://doi.org/10.1093/nar/gky442) [Medline](#)
71. F. Sievers, A. Wilm, D. Dineen, T. J. Gibson, K. Karplus, W. Li, R. Lopez, H. McWilliam, M. Remmert, J. Söding, J. D. Thompson, D. G. Higgins, Fast, scalable generation of high-quality protein multiple sequence alignments using Clustal Omega. *Mol. Syst. Biol.* **7**, 539 (2011). [doi:10.1038/msb.2011.75](https://doi.org/10.1038/msb.2011.75) [Medline](#)
72. H. Ashkenazy, S. Abadi, E. Martz, O. Chay, I. Mayrose, T. Pupko, N. Ben-Tal, ConSurf 2016: An improved methodology to estimate and visualize evolutionary conservation in macromolecules. *Nucleic Acids Res.* **44**, W344–W350 (2016). [doi:10.1093/nar/gkw408](https://doi.org/10.1093/nar/gkw408) [Medline](#)

73. D. W. A. Buchan, D. T. Jones, The PSIPRED Protein Analysis Workbench: 20 years on. *Nucleic Acids Res.* **47**, W402–W407 (2019). [doi:10.1093/nar/gkz297](https://doi.org/10.1093/nar/gkz297) [Medline](#)
74. Y. Z. Tan, P. R. Baldwin, J. H. Davis, J. R. Williamson, C. S. Potter, B. Carragher, D. Lyumkis, Addressing preferred specimen orientation in single-particle cryo-EM through tilting. *Nat. Methods* **14**, 793–796 (2017). [doi:10.1038/nmeth.4347](https://doi.org/10.1038/nmeth.4347) [Medline](#)
75. R. Lorenz, S. H. Bernhart, C. Höner Zu Siederdisen, H. Tafer, C. Flamm, P. F. Stadler, I. L. Hofacker, ViennaRNA Package 2.0. *Algorithms Mol. Biol.* **6**, 26 (2011). [doi:10.1186/1748-7188-6-26](https://doi.org/10.1186/1748-7188-6-26) [Medline](#)
76. M. Popenda, M. Szachniuk, M. Antczak, K. J. Purzycka, P. Lukasiak, N. Bartol, J. Blazewicz, R. W. Adamiak, Automated 3D structure composition for large RNAs. *Nucleic Acids Res.* **40**, e112 (2012). [doi:10.1093/nar/gks339](https://doi.org/10.1093/nar/gks339) [Medline](#)
